# Supplementary material for: Synthesis, Characterization, and Anticancer Activity of New N,N′-Diarylthiourea Derivative against Breast Cancer Cells
Source: MDPI journal article supplement (doi:10.3390/molecules28176420), 2023-09-03
Supplement: s1 [file s1]

# Synthesis, Characterization, and Anticancer Activity of New N,N'-Diarylthiourea Derivative against Breast Cancer Cells

Mohamed A. El-Atawy <sup>1,2</sup>, Mai S. Alsubaie <sup>1</sup>, Mohammed L. Alazmi <sup>1</sup>, Ezzat A. Hamed <sup>1,\*</sup>,  
Demiana H. Hanna <sup>3,\*</sup>, Hoda A. Ahmed <sup>3</sup> and Alaa Z. Omar <sup>1</sup>

<sup>1</sup> Chemistry Department, Faculty of Science, Alexandria University, P.O. Box 426 Ibrahemia, Alexandria 21321, Egypt; mohamed.elatawi@alexu.edu.eg (M.A.E.-A.); maisaudalsubaie@gmail.com (M.S.A.); mohammadalazmmi@gmail.com (M.L.A.); alazaki@alexu.edu.eg (A.Z.O.)

<sup>2</sup> Chemistry Department, Faculty of Science, Taibah University, Yanbu 46423, Saudi Arabia

<sup>3</sup> Department of Chemistry, Faculty of Science, Cairo University, Giza 12613, Egypt; ahoda@sci.cu.edu.eg

\* Correspondence: ezzat.awad@alexu.edu.eg (E.A.H.); dhelmy@sci.cu.edu.eg (D.H.H.)

**Table S1: Effect of the tested compounds (1- 6) on MCF-7 cell viability through the different doses (50 to 1000  $\mu$ M) for 24 h incubation.**

| <b>Dose<br/>(<math>\mu</math>M)</b> | <b>Cell Viability %</b> |                   |                   |                   |                   |                   |
|-------------------------------------|-------------------------|-------------------|-------------------|-------------------|-------------------|-------------------|
|                                     | <b>Compound 1</b>       | <b>Compound 2</b> | <b>Compound 3</b> | <b>Compound 4</b> | <b>Compound 5</b> | <b>Compound 6</b> |
| <b>1000</b>                         | 36.41 $\pm$ 1.34        | 23.32 $\pm$ 2.33  | 20.93 $\pm$ 2.75  | 7.28 $\pm$ 2.56   | 17.98 $\pm$ 1.45  | 36.73 $\pm$ 1.66  |
| <b>600</b>                          | 57.24 $\pm$ 2.44        | 38.27 $\pm$ 1.97  | 56.73 $\pm$ 2.55  | 18.31 $\pm$ 1.92  | 45.37 $\pm$ 2.74  | 46.91 $\pm$ 2.34  |
| <b>300</b>                          | 67.17 $\pm$ 1.13        | 49.86 $\pm$ 1.77  | 64.92 $\pm$ 1.66  | 21.21 $\pm$ 1.66  | 61.98 $\pm$ 1.84  | 79.23 $\pm$ 2.64  |
| <b>150</b>                          | 80.62 $\pm$ 2.76        | 72.24 $\pm$ 2.13  | 80.68 $\pm$ 2.44  | 48.14 $\pm$ 1.15  | 79.45 $\pm$ 1.92  | 84.11 $\pm$ 1.83  |
| <b>100</b>                          | 87.32 $\pm$ 1.34        | 88.57 $\pm$ 2.22  | 93.59 $\pm$ 1.82  | 90.23 $\pm$ 2.78  | 96.45 $\pm$ 2.33  | 91.71 $\pm$ 2.47  |
| <b>50</b>                           | 98.58 $\pm$ 2.21        | 98.76 $\pm$ 2.26  | 97.28 $\pm$ 2.45  | 99.95 $\pm$ 2.24  | 98.64 $\pm$ 2.53  | 96.44 $\pm$ 2.63  |

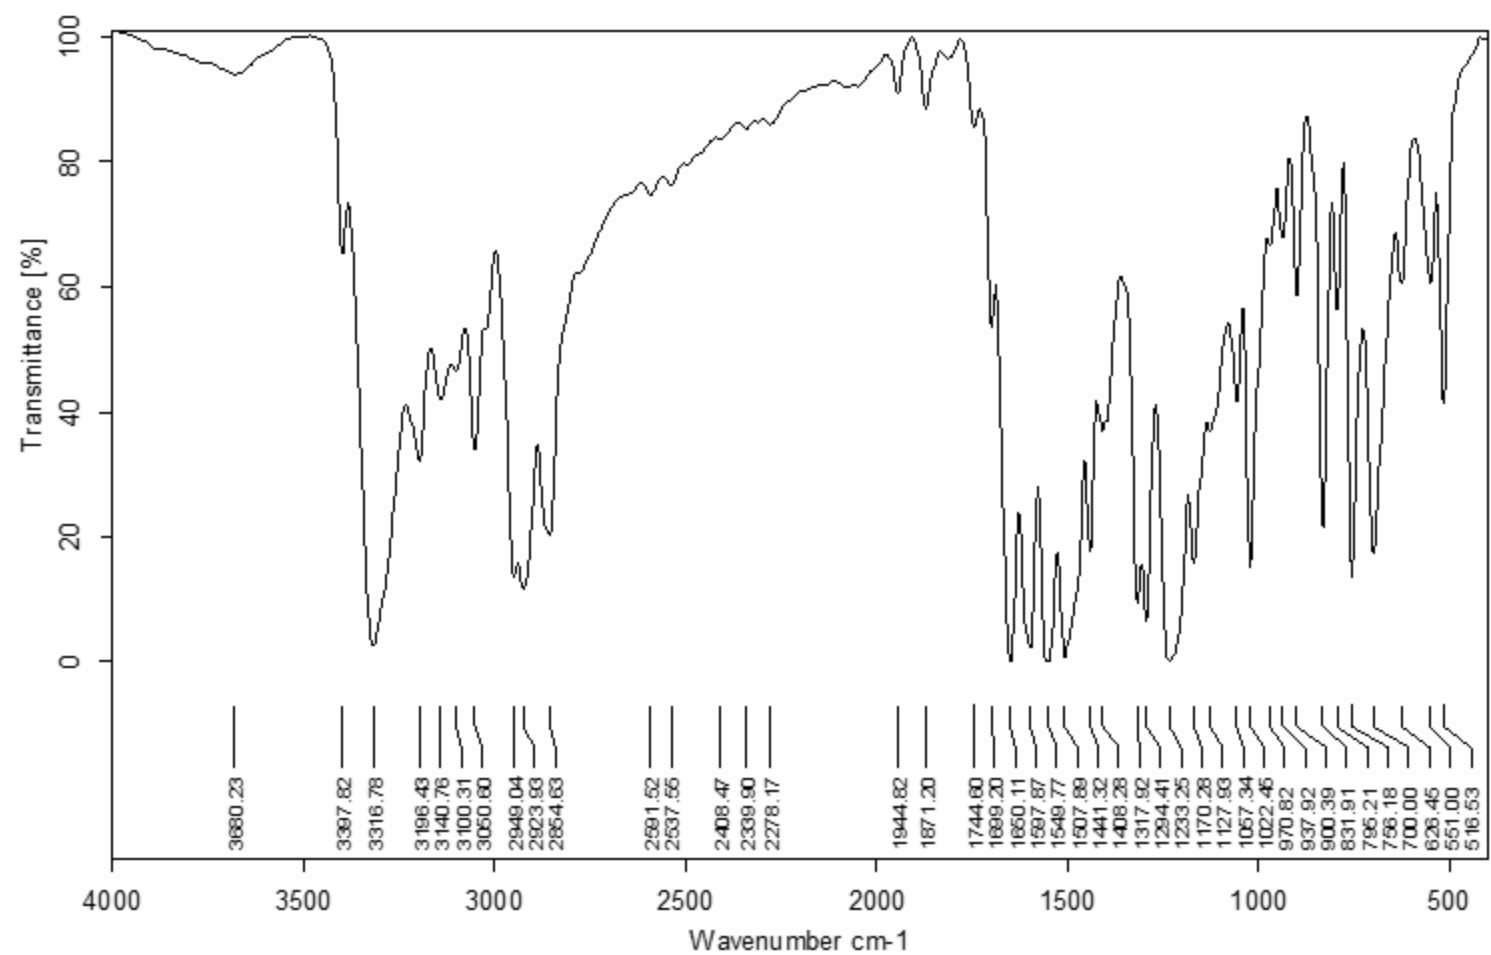

IR (KBr) spectrum of 1-(4-(hexyloxy)phenyl)-3-phenylurea **1**

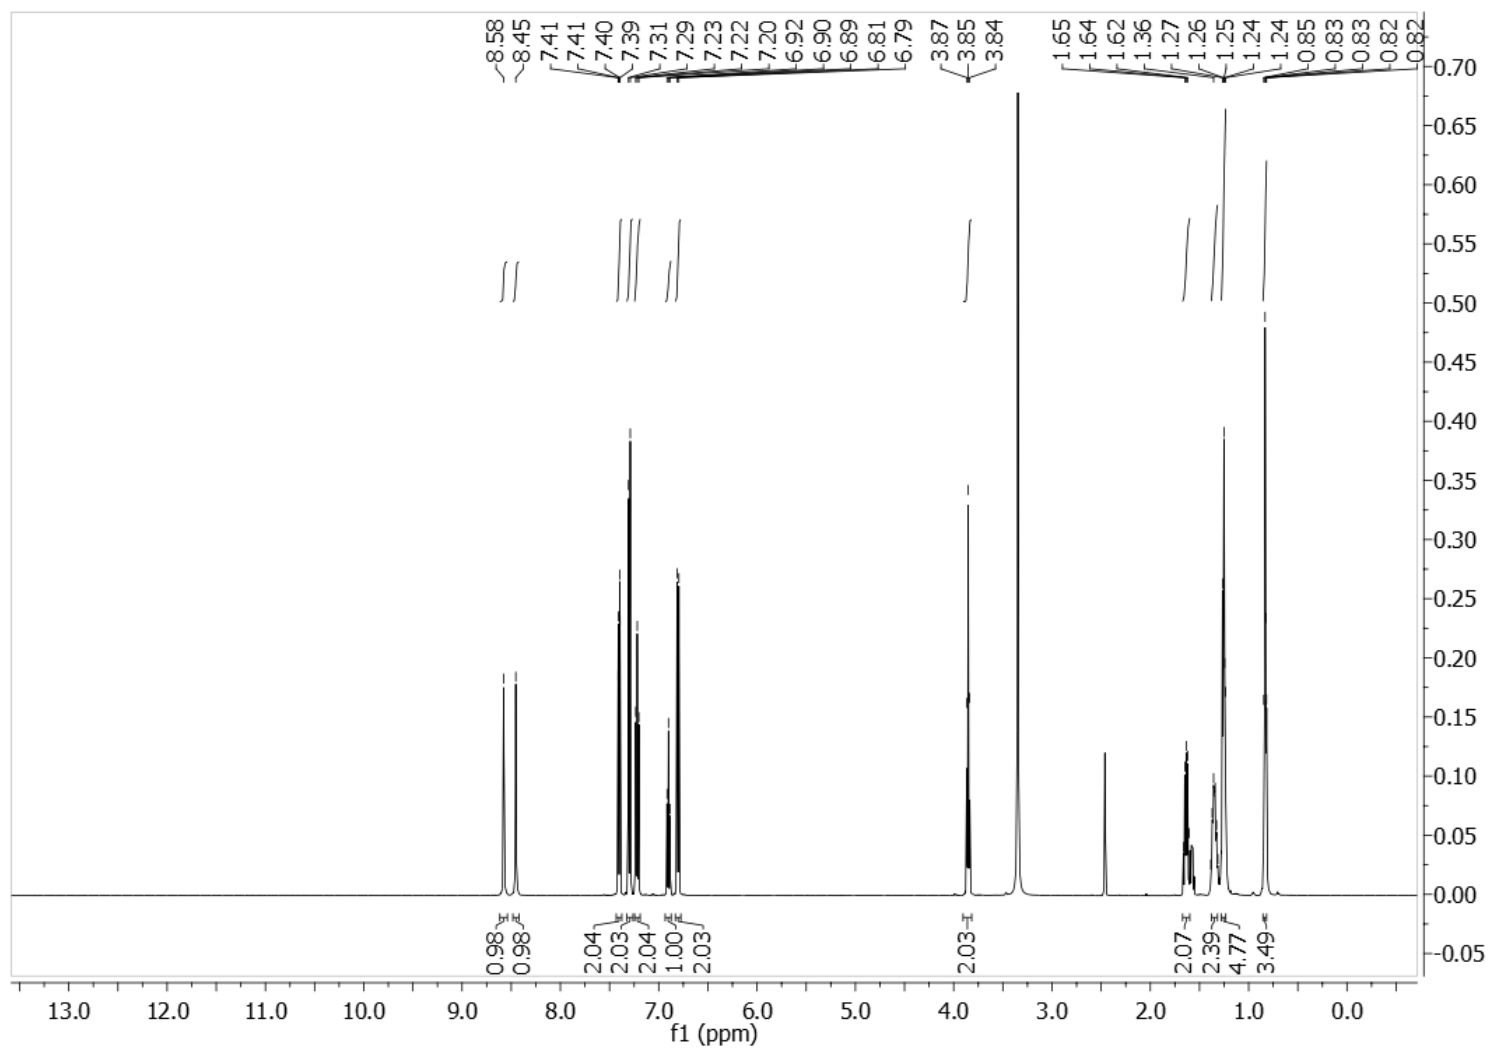

<sup>1</sup>H NMR (DMSO-*d*<sub>6</sub>) spectrum of 1-(4-(hexyloxy)phenyl)-3-phenylurea **1**

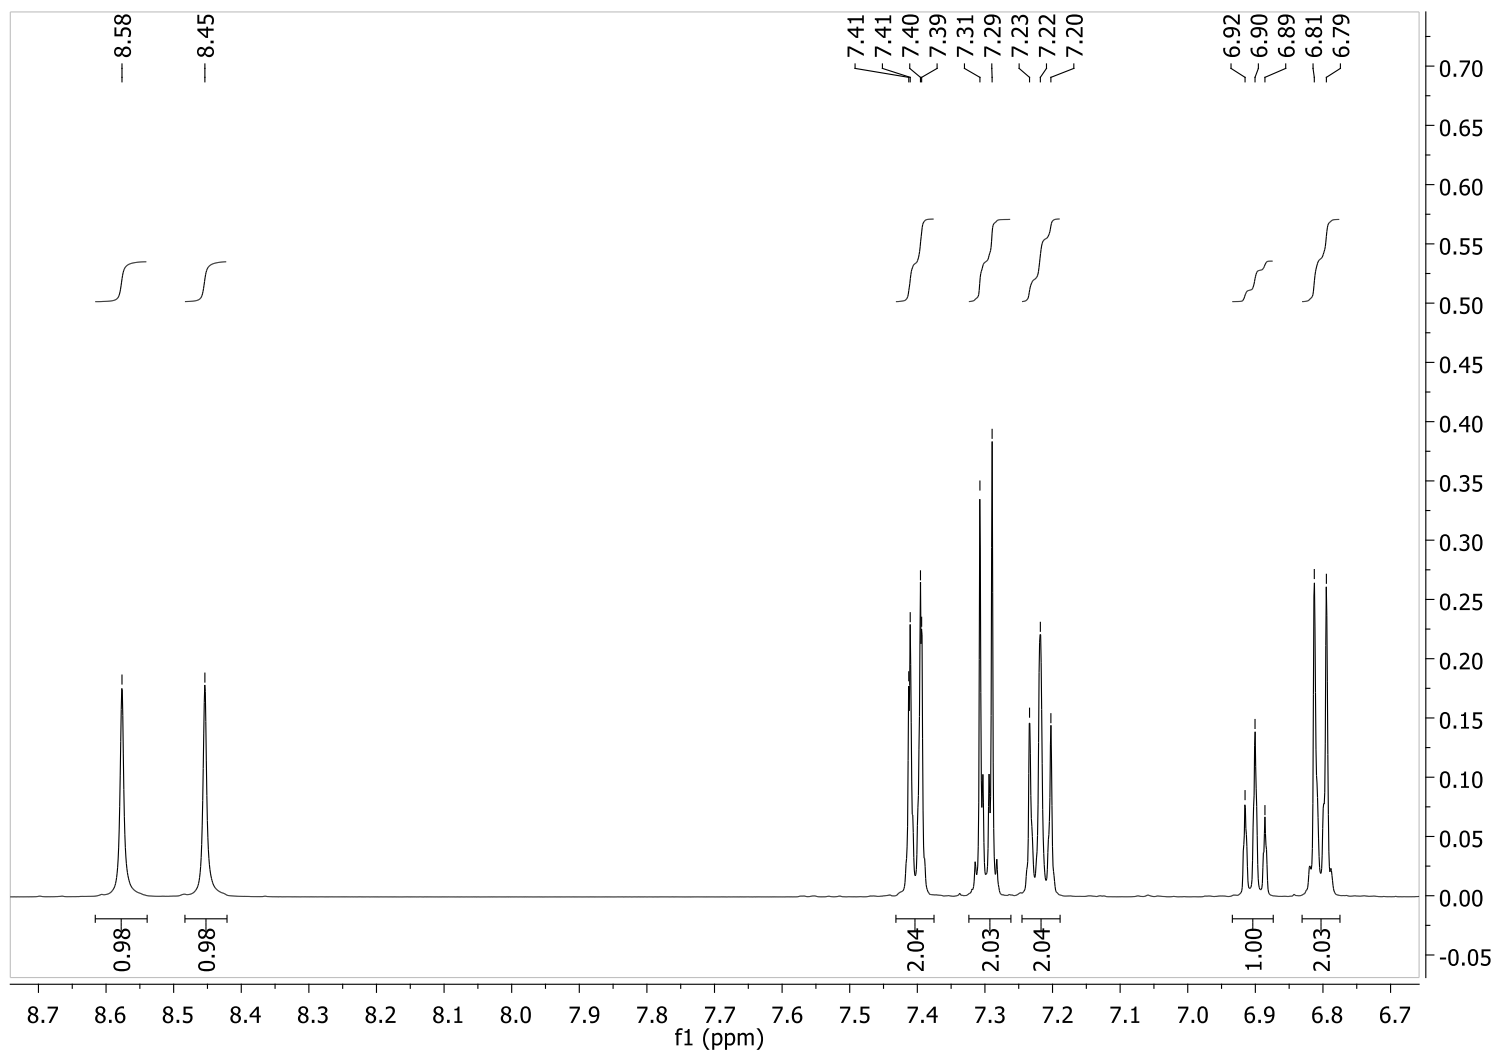

<sup>1</sup>H NMR (DMSO-*d*<sub>6</sub>) spectrum of 1-(4-(hexyloxy)phenyl)-3-phenylurea **1**

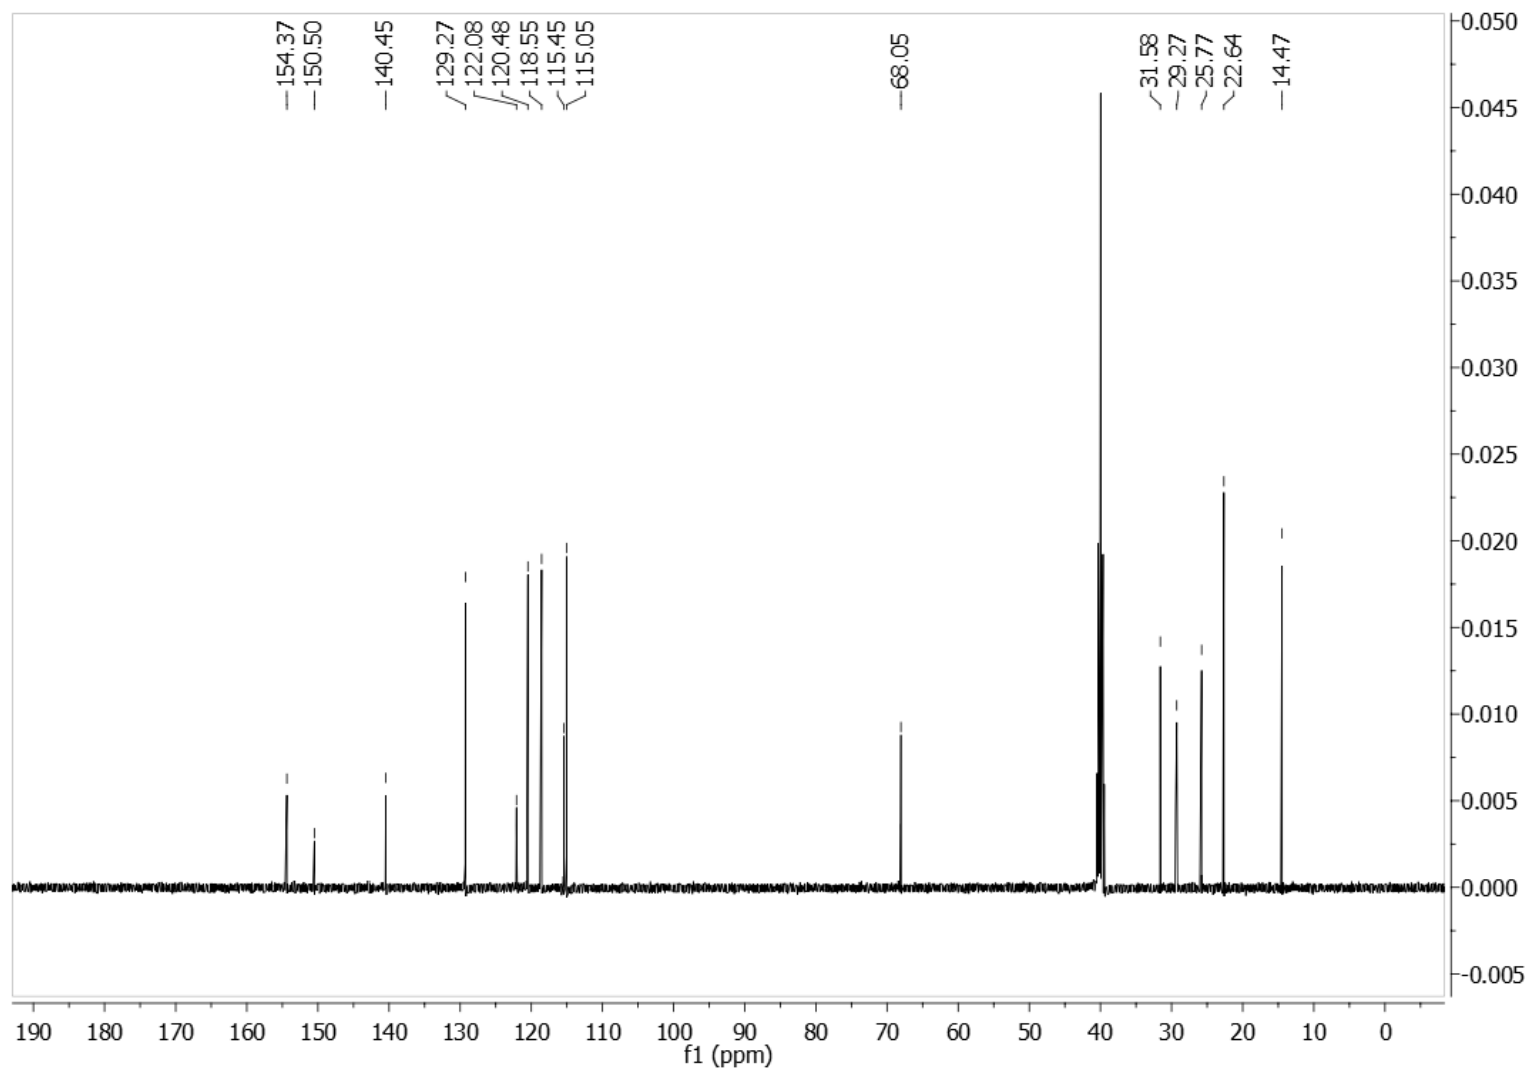

<sup>13</sup>C NMR (DMSO-*d*<sub>6</sub>) of 1-(4-(hexyloxy)phenyl)-3-phenylurea **1**

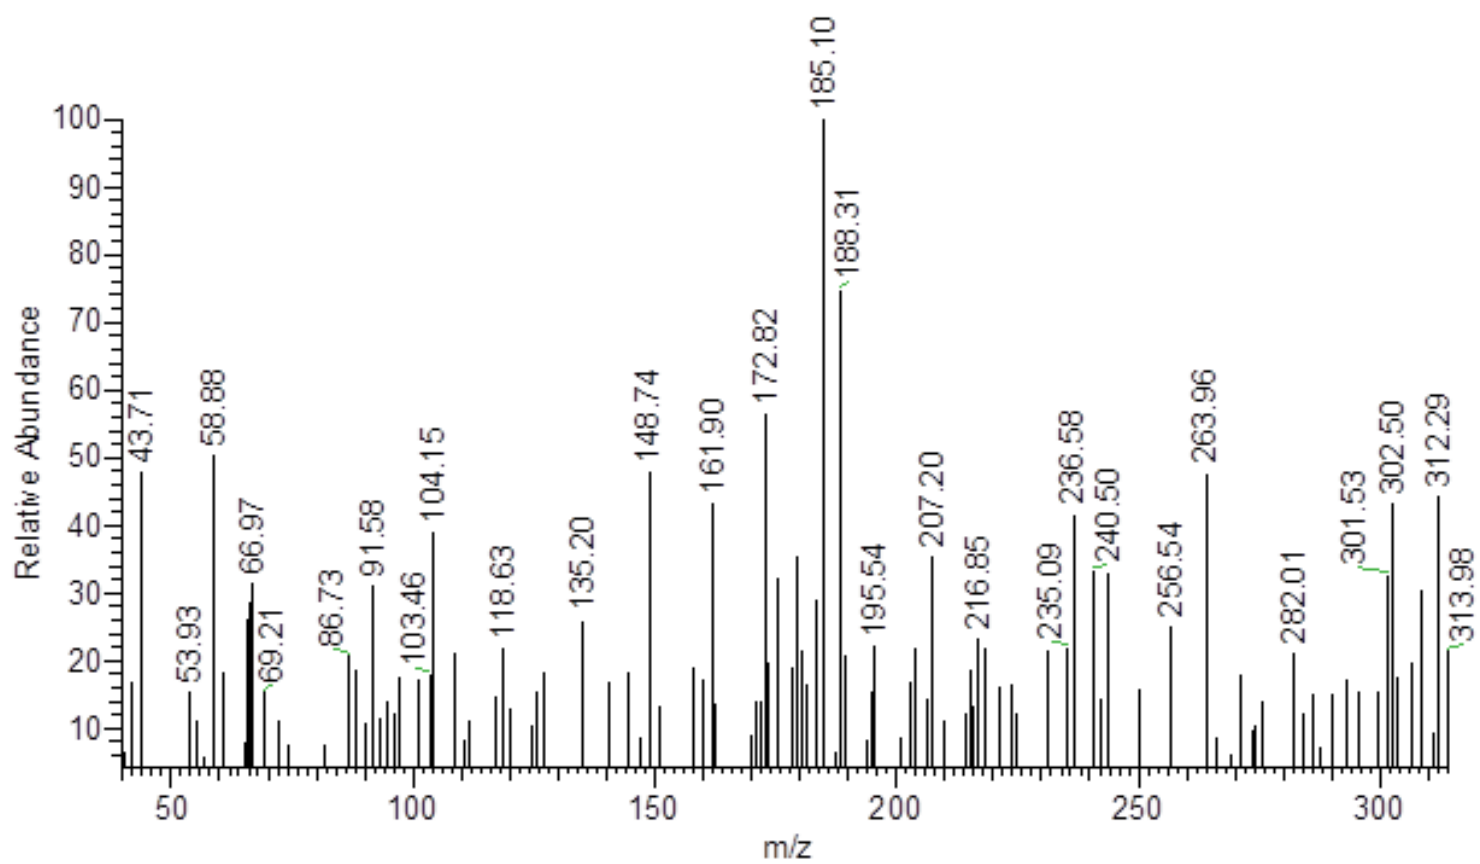

Mass spectrum of 1-(4-(hexyloxy)phenyl)-3-phenylurea **1**

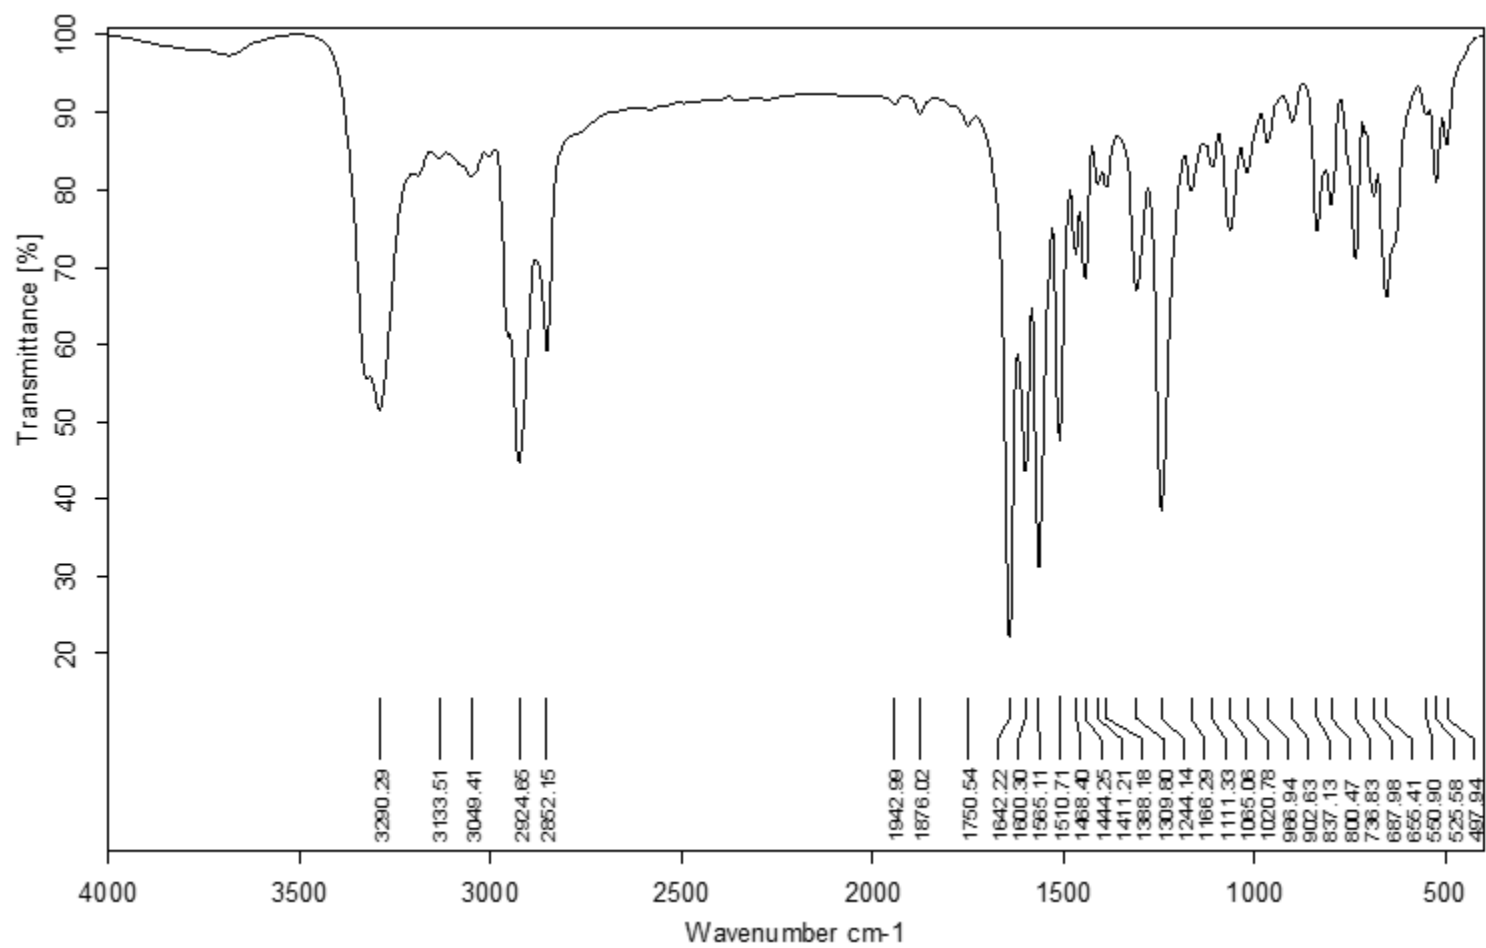

IR (KBr) spectrum of 1-(4-(octyloxy)phenyl)-3-phenylurea **2**



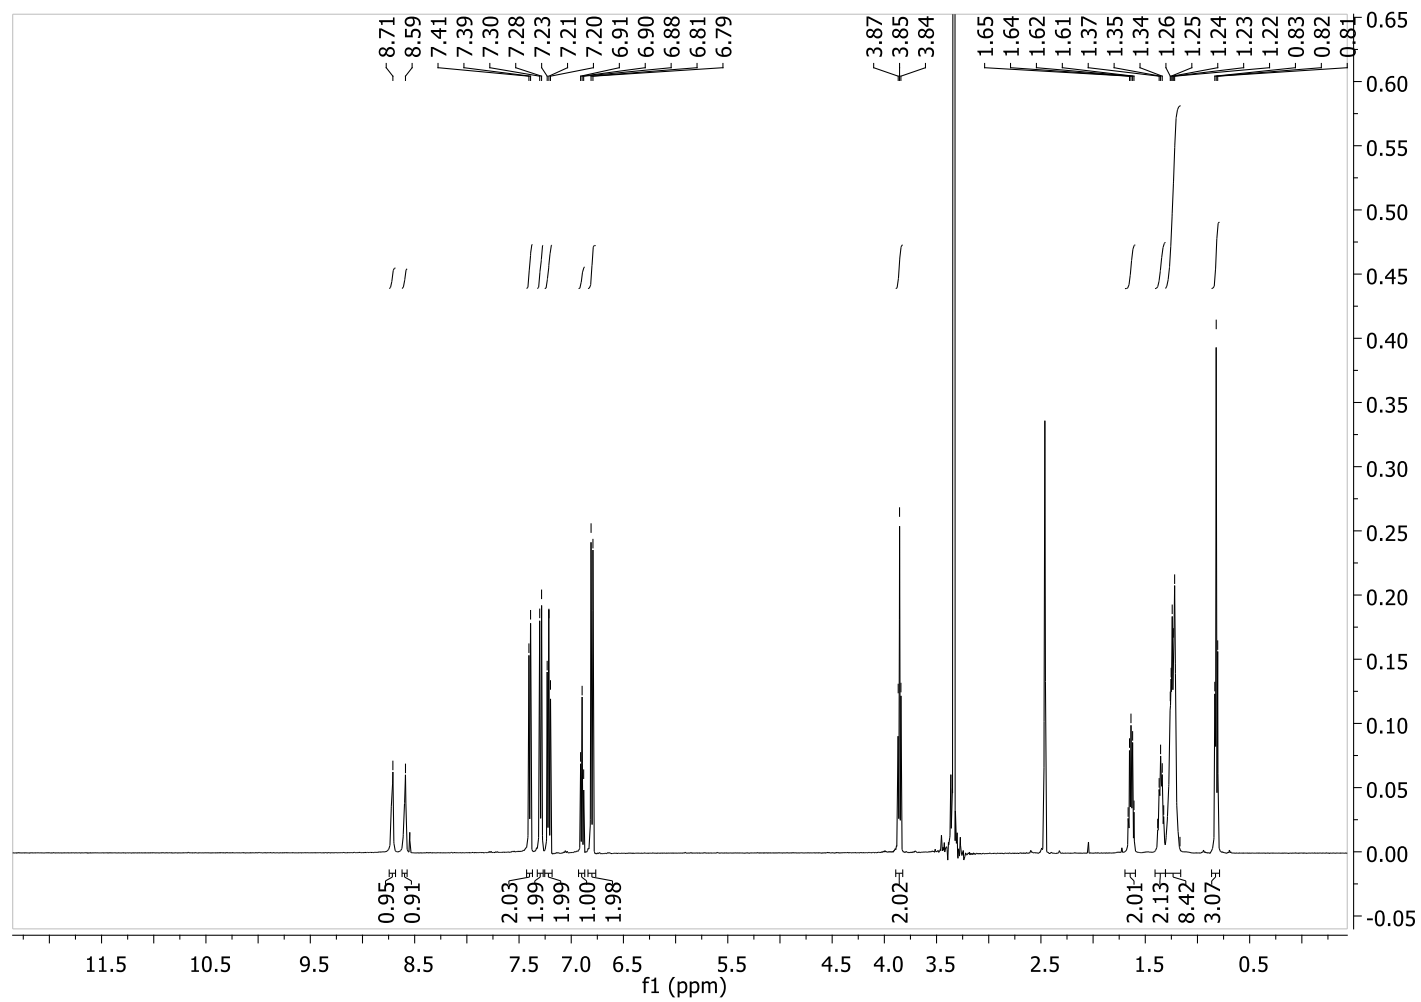

<sup>1</sup>H NMR (DMSO-*d*<sub>6</sub>) spectrum of 1-(4-(octyloxy)phenyl)-3-phenylurea **2**

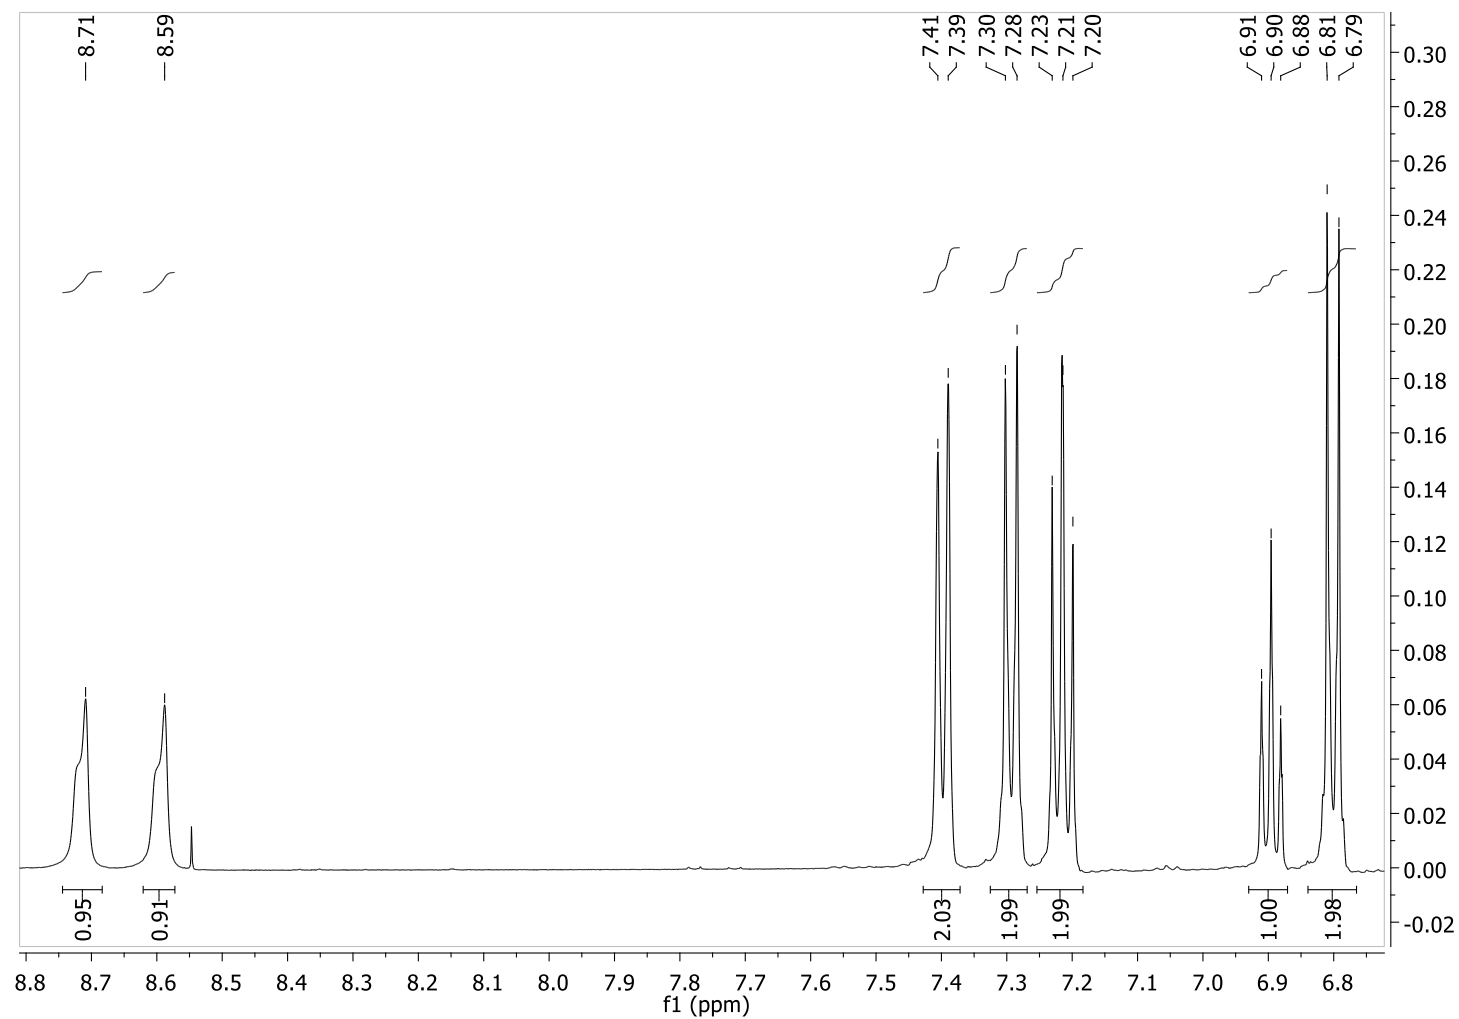

<sup>1</sup>H NMR (DMSO-*d*<sub>6</sub>) spectrum of 1-(4-(octyloxy)phenyl)-3-phenylurea **2**

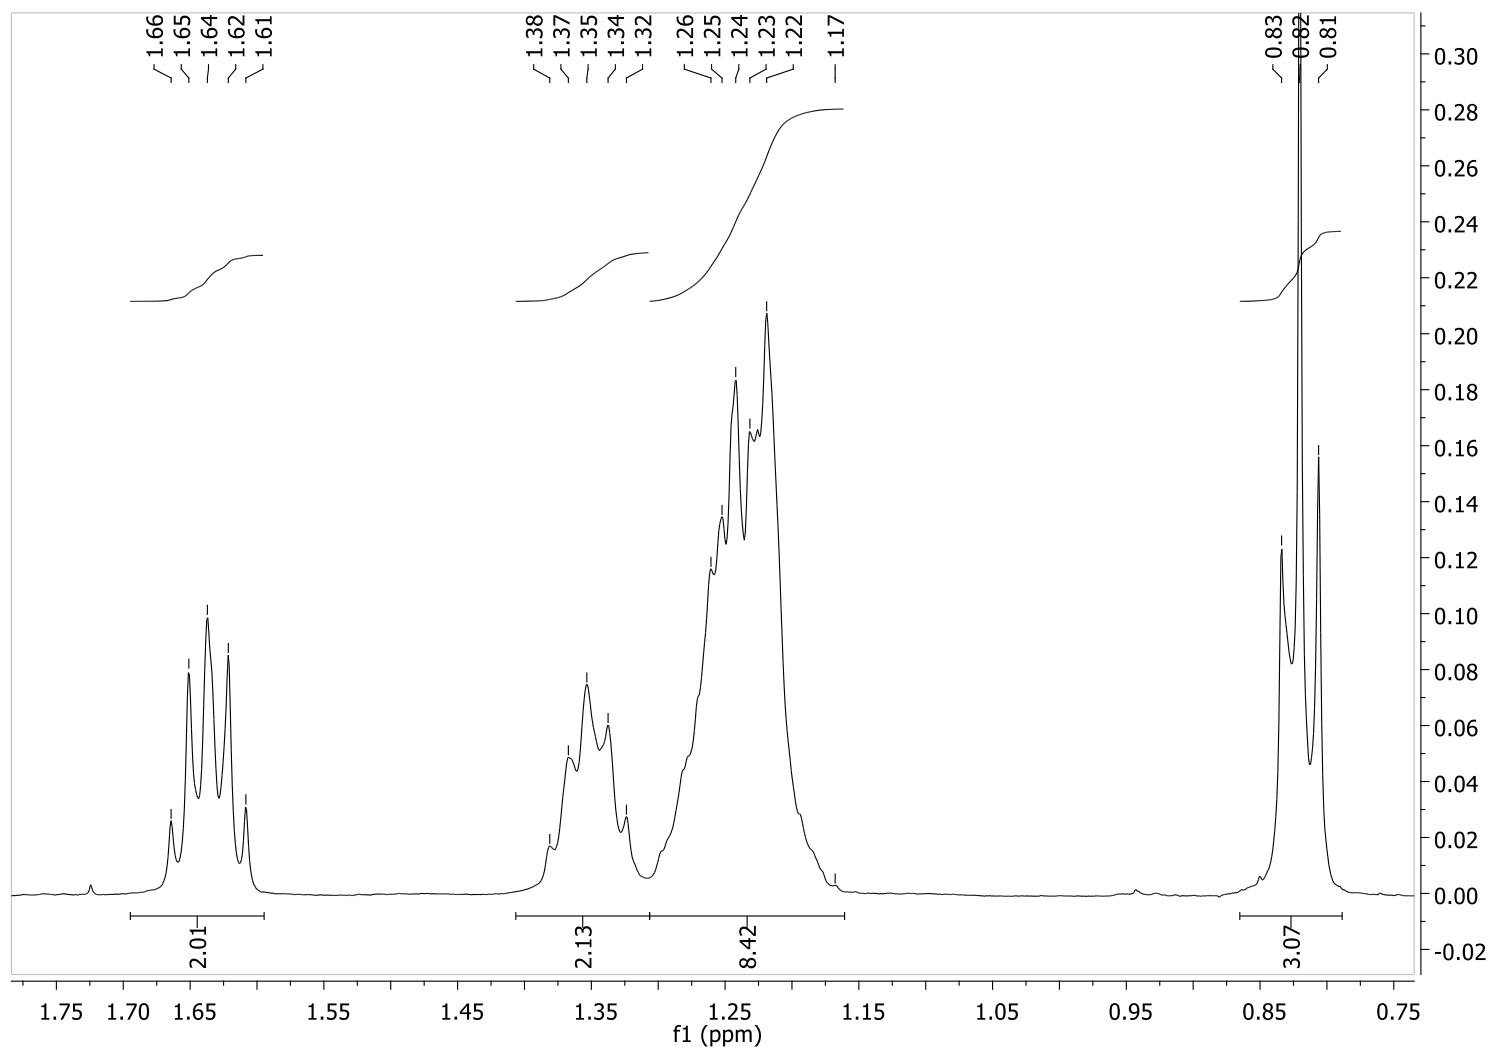

<sup>1</sup>H NMR (DMSO-*d*<sub>6</sub>) spectrum of 1-(4-(octyloxy)phenyl)-3-phenylurea **2**

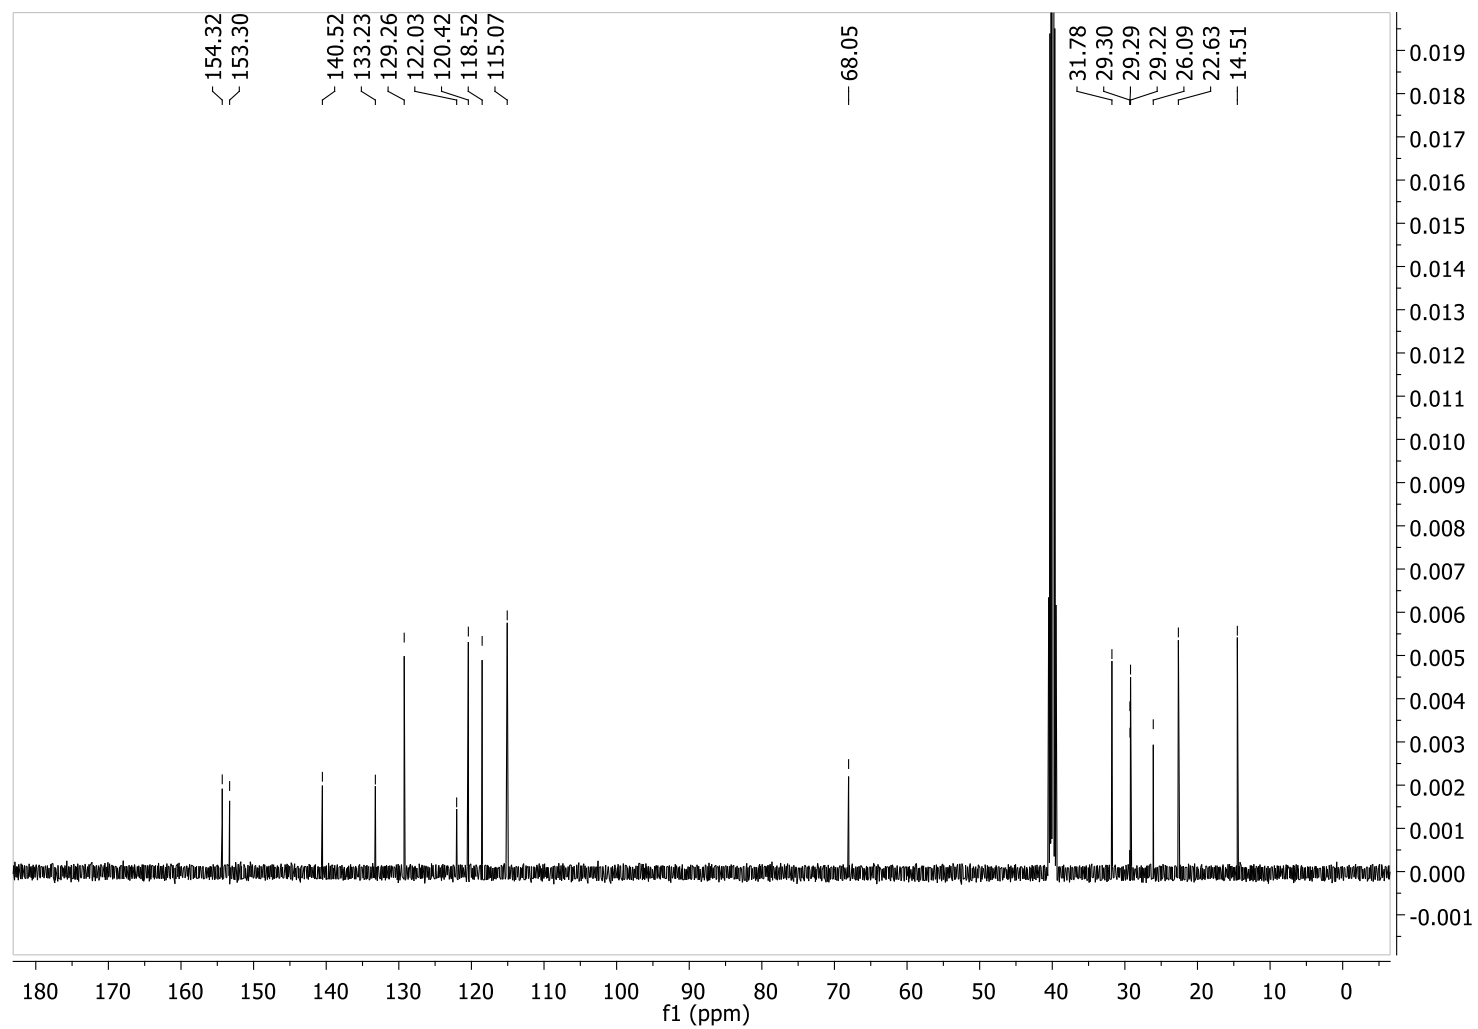

$^{13}\text{C}$  NMR (DMSO- $d_6$ ) of 1-(4-(octyloxy)phenyl)-3-phenylurea **2**

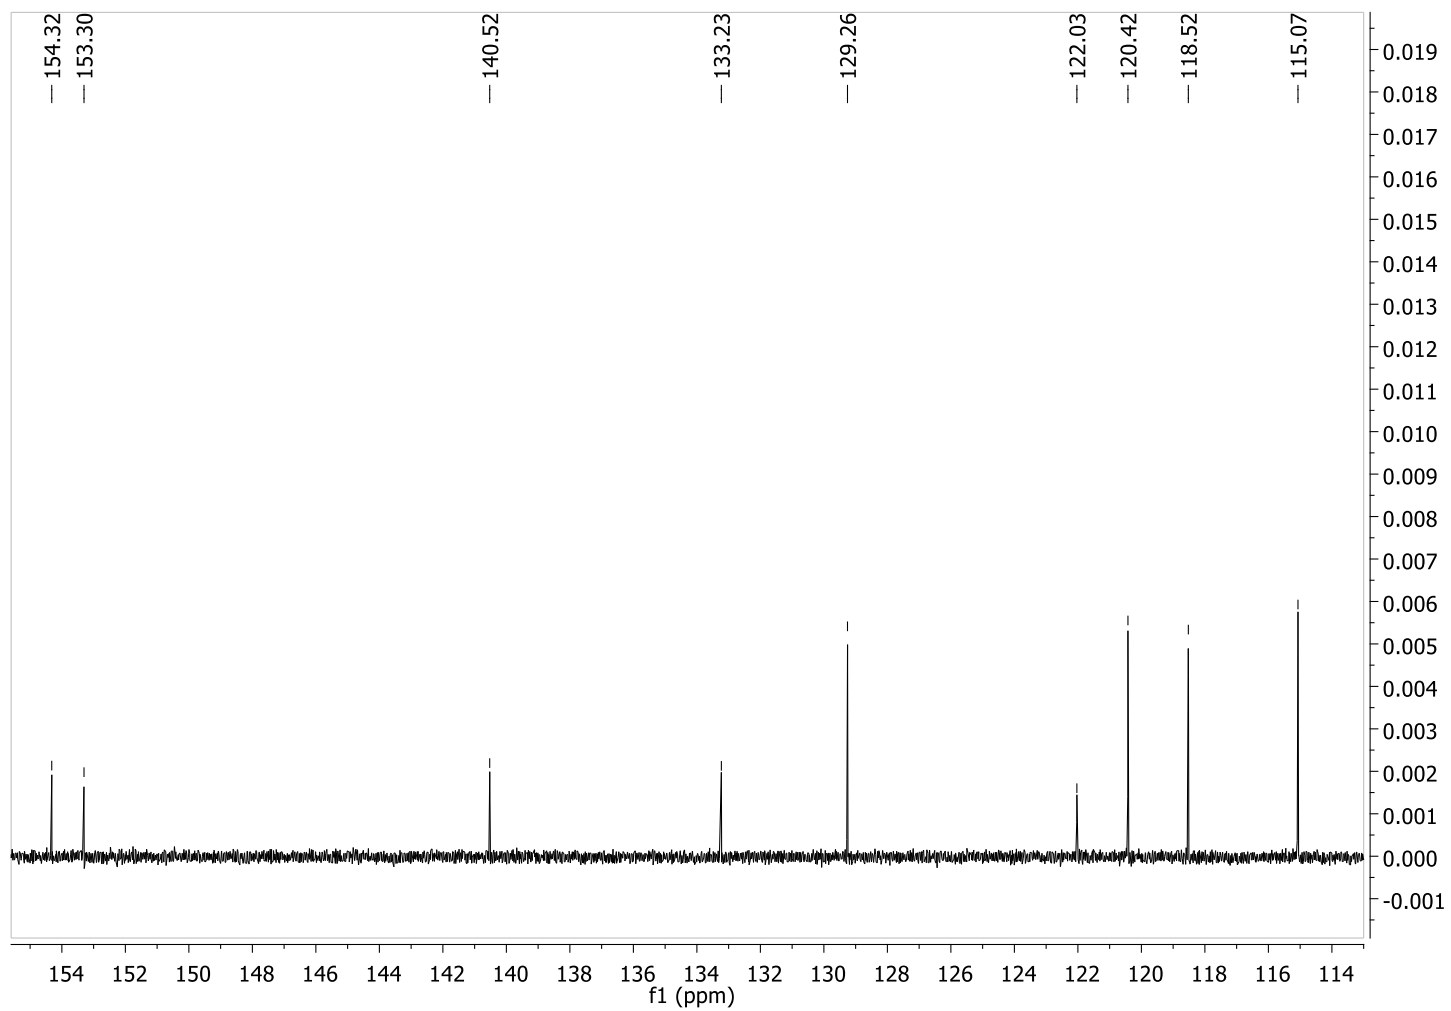

<sup>13</sup>C NMR (DMSO-*d*<sub>6</sub>) of 1-(4-(octyloxy)phenyl)-3-phenylurea **2**

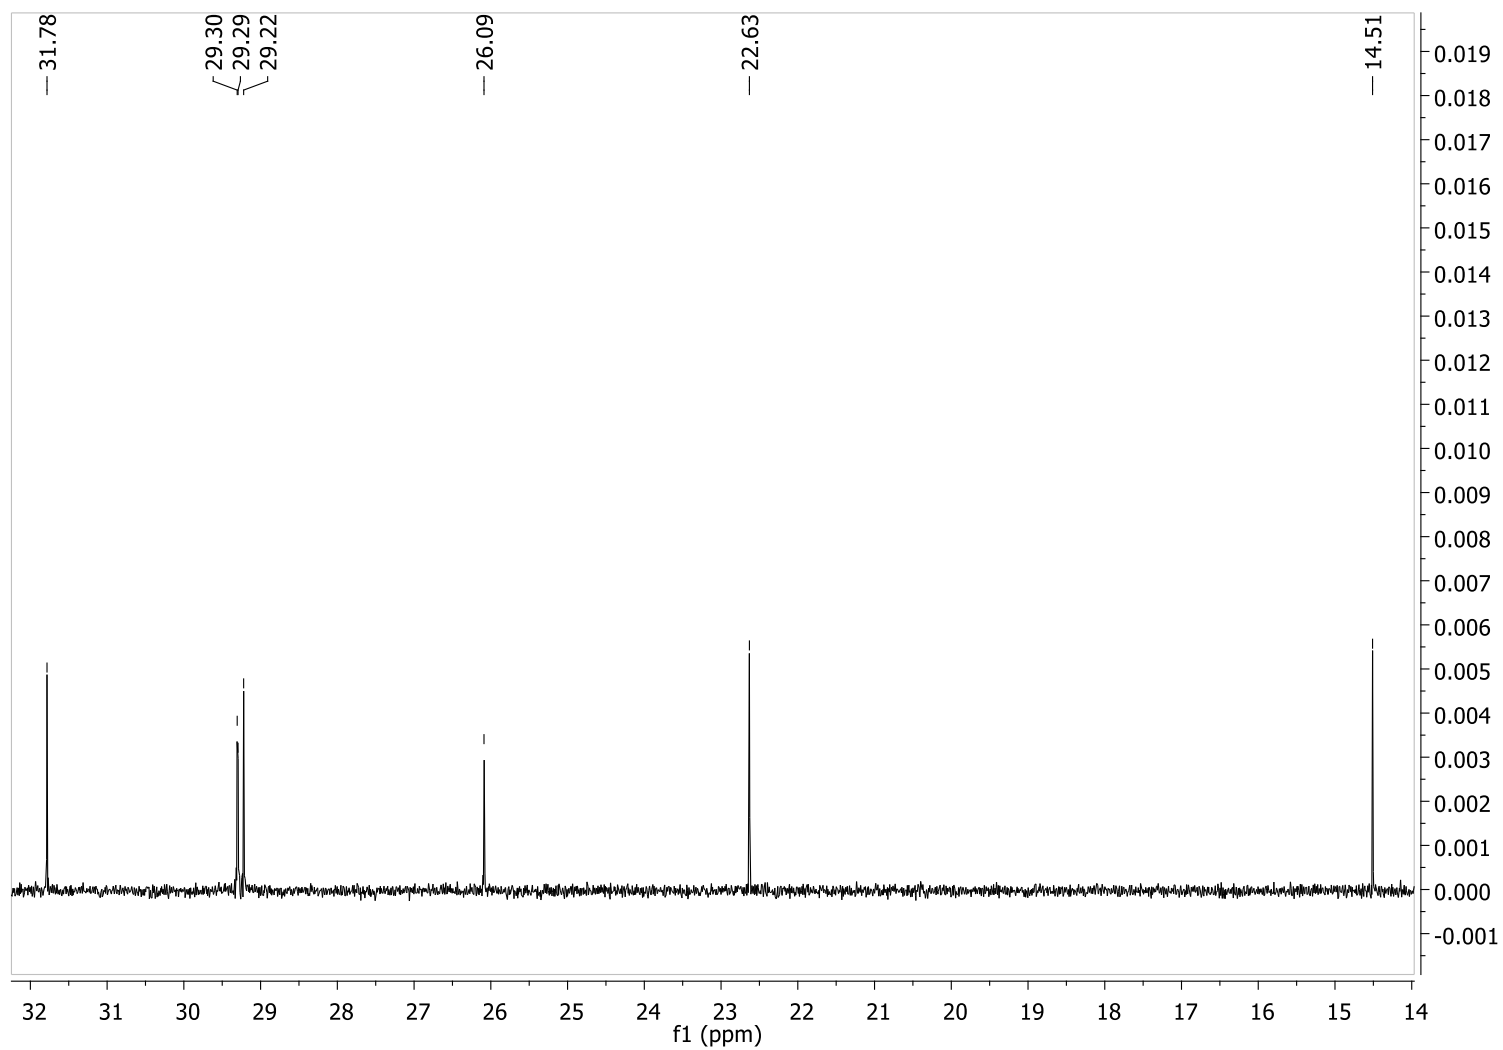

<sup>13</sup>C NMR (DMSO-*d*<sub>6</sub>) of 1-(4-(octyloxy)phenyl)-3-phenylurea **2**

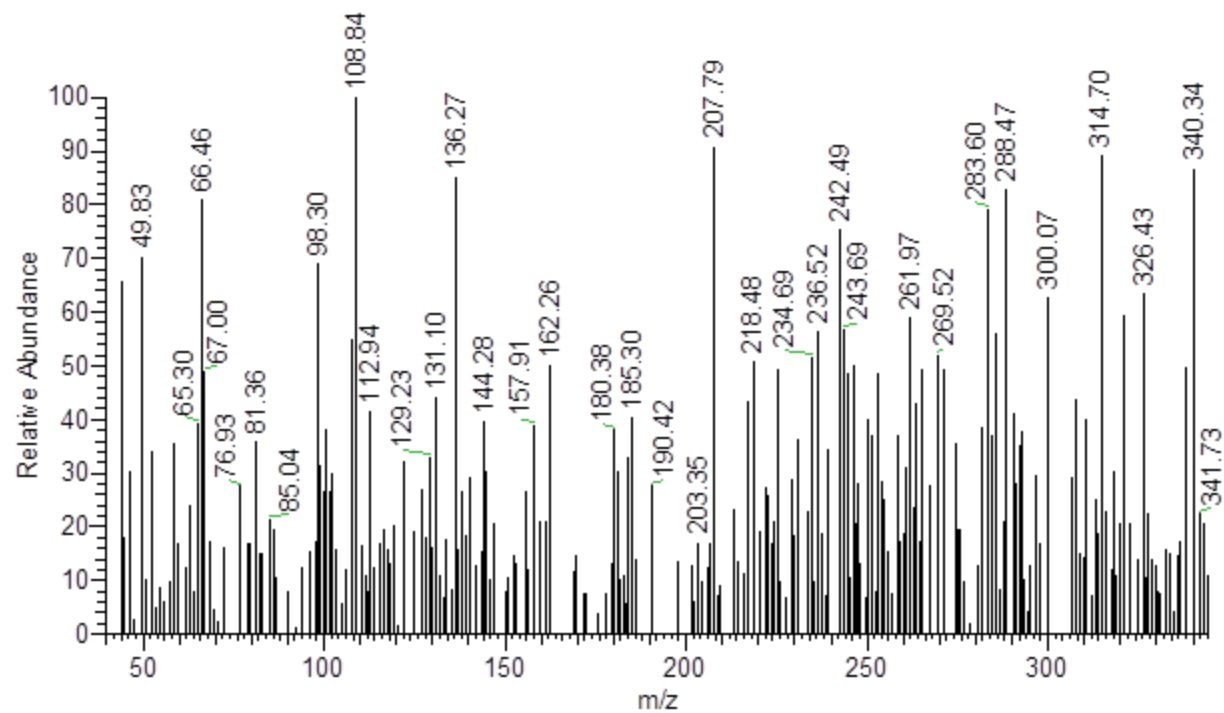

Mass spectrum of 1-(4-(octyloxy)phenyl)-3-phenylurea **2**

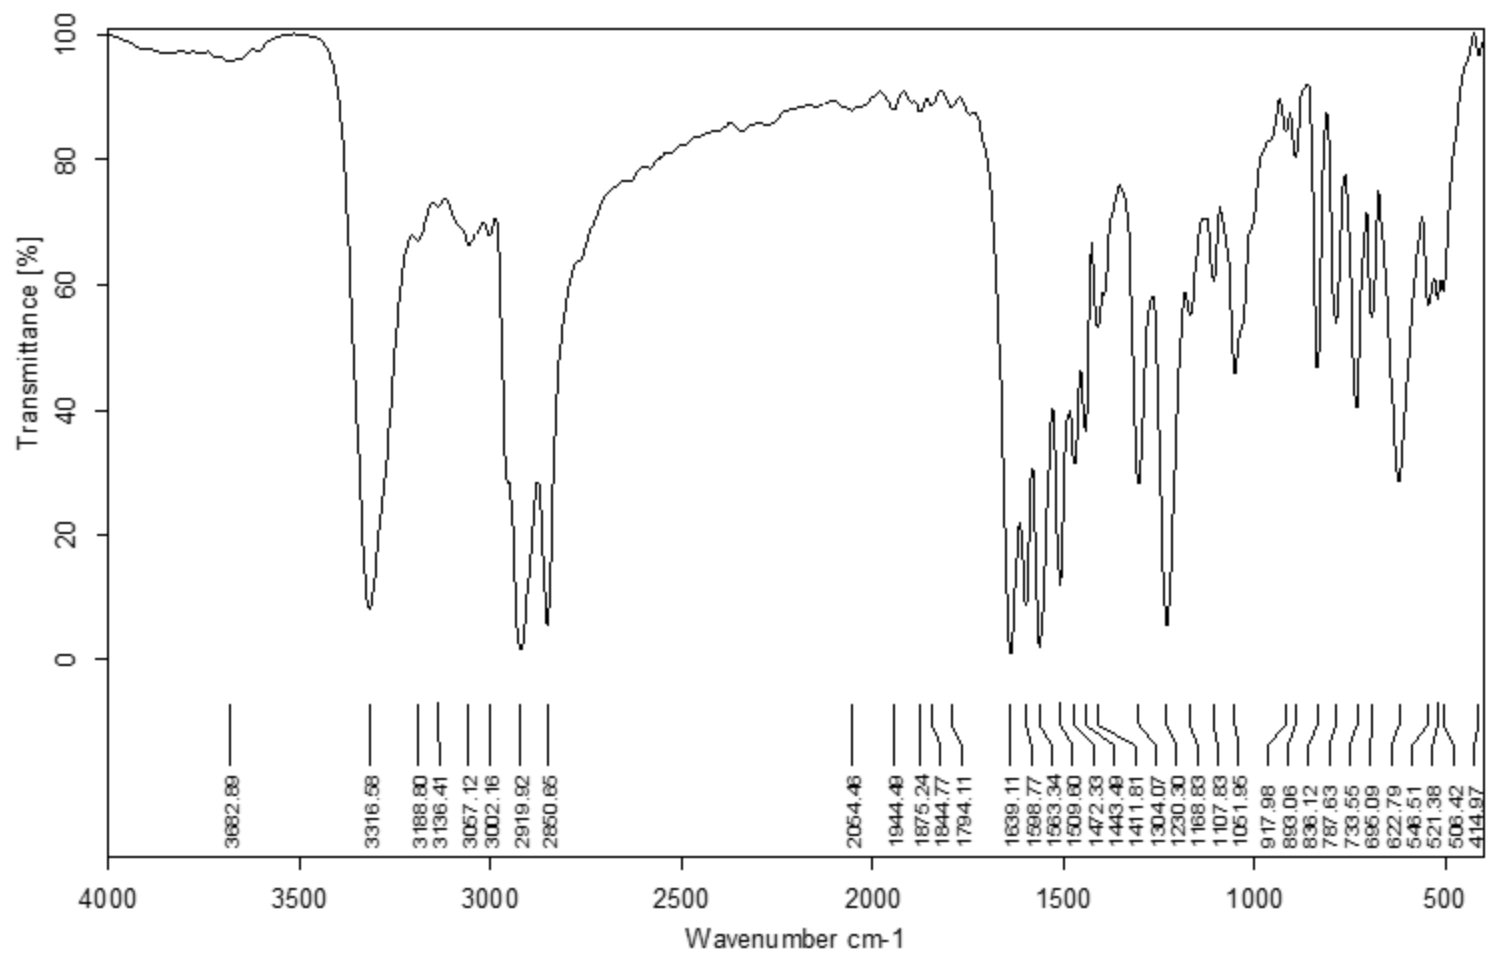

IR (KBr) spectrum of 1-(4-(hexadecyloxy)phenyl)-3-phenylurea **3**



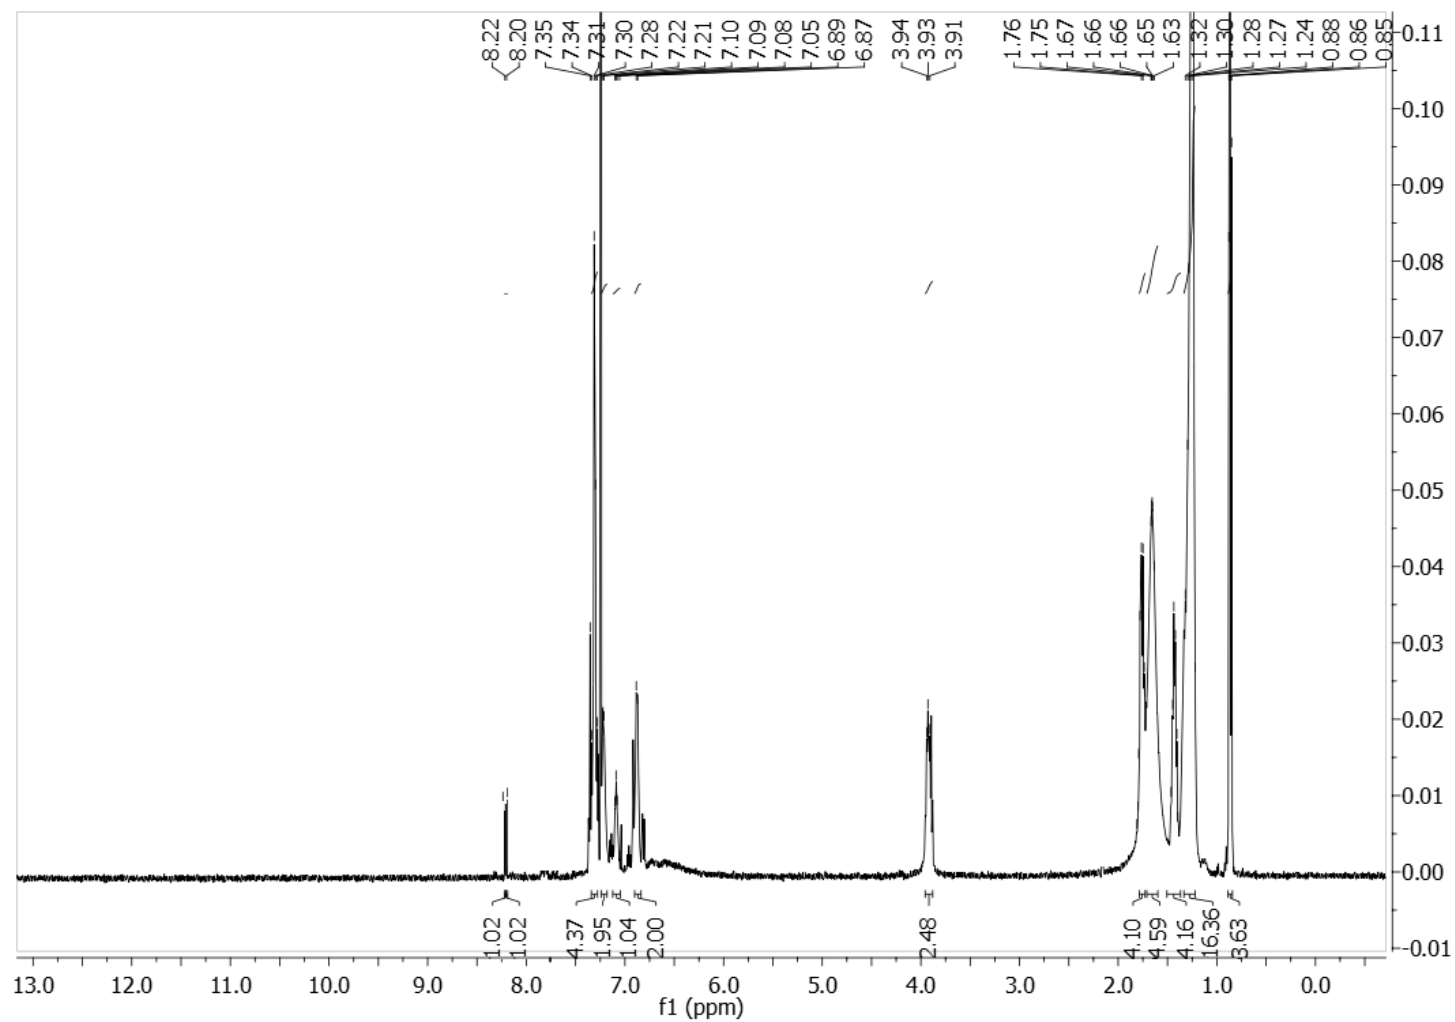

$^1\text{H}$  NMR ( $\text{CDCl}_3$ ) spectrum of 1-(4-(hexadecyloxy)phenyl)-3-phenylurea **3**

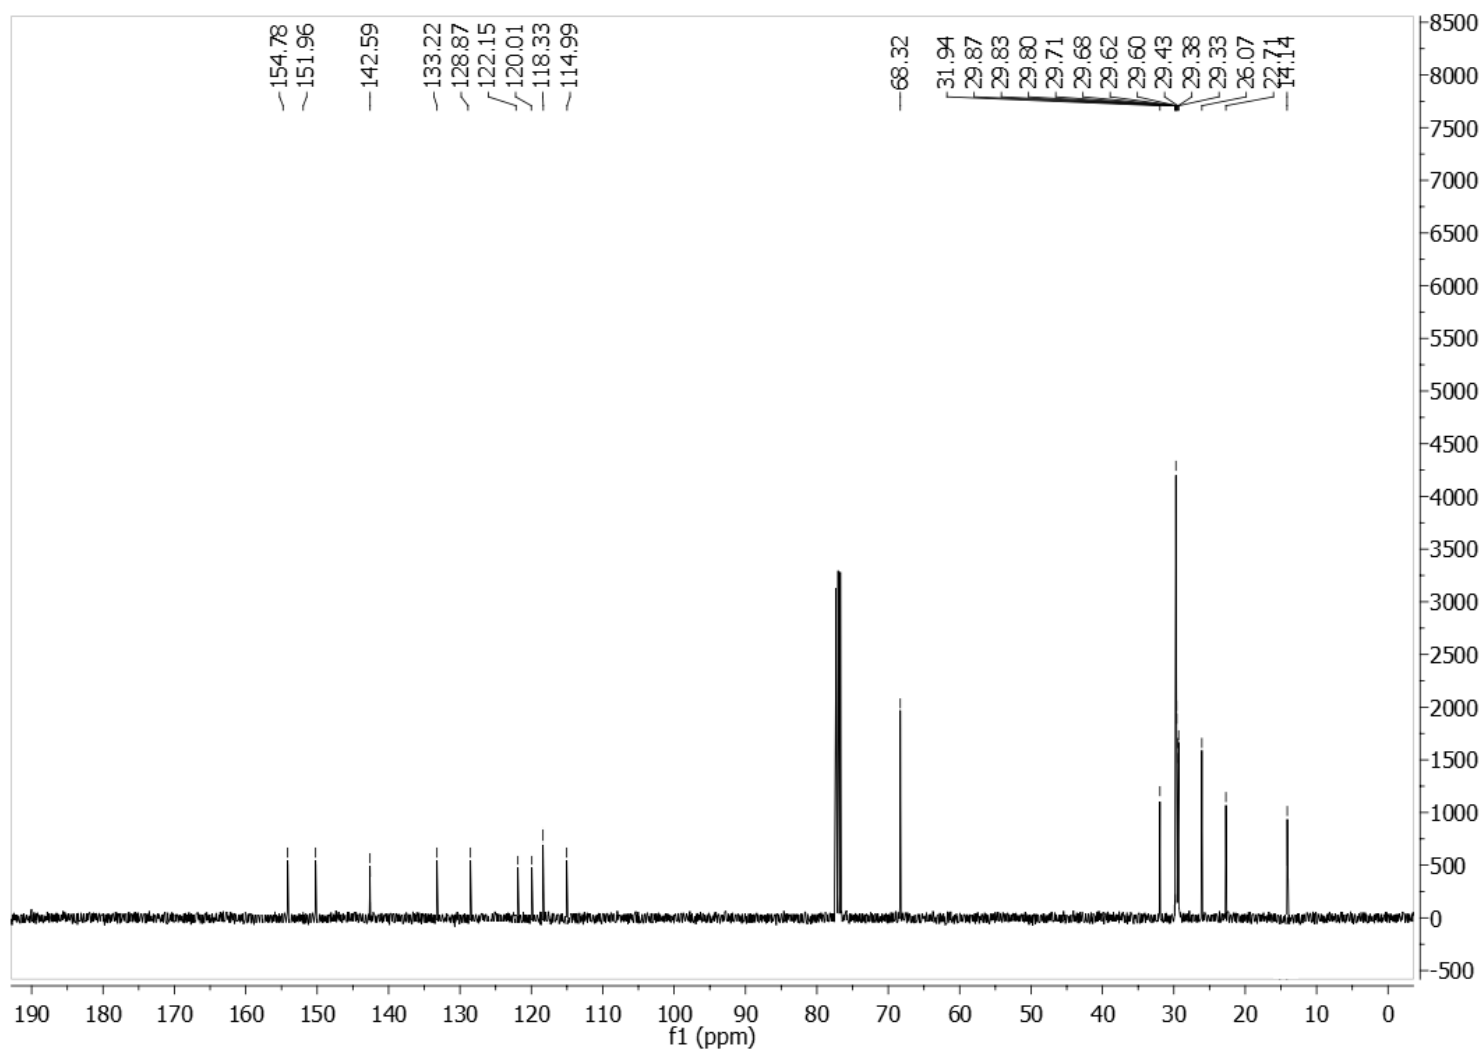

<sup>13</sup>C NMR (CDCl<sub>3</sub>) of 1-(4-(hexadecyloxy)phenyl)-3-phenylurea **3**

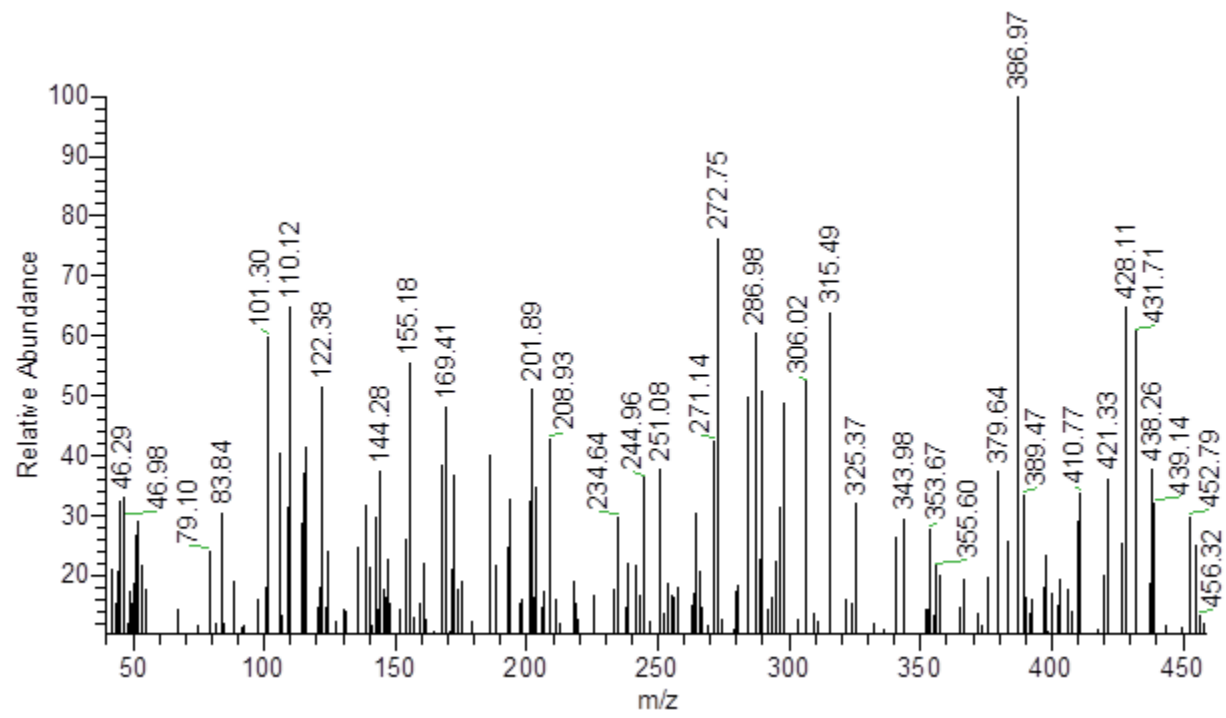

Mass spectrum of 1-(4-(hexadecyloxy)phenyl)-3-phenylurea **3**

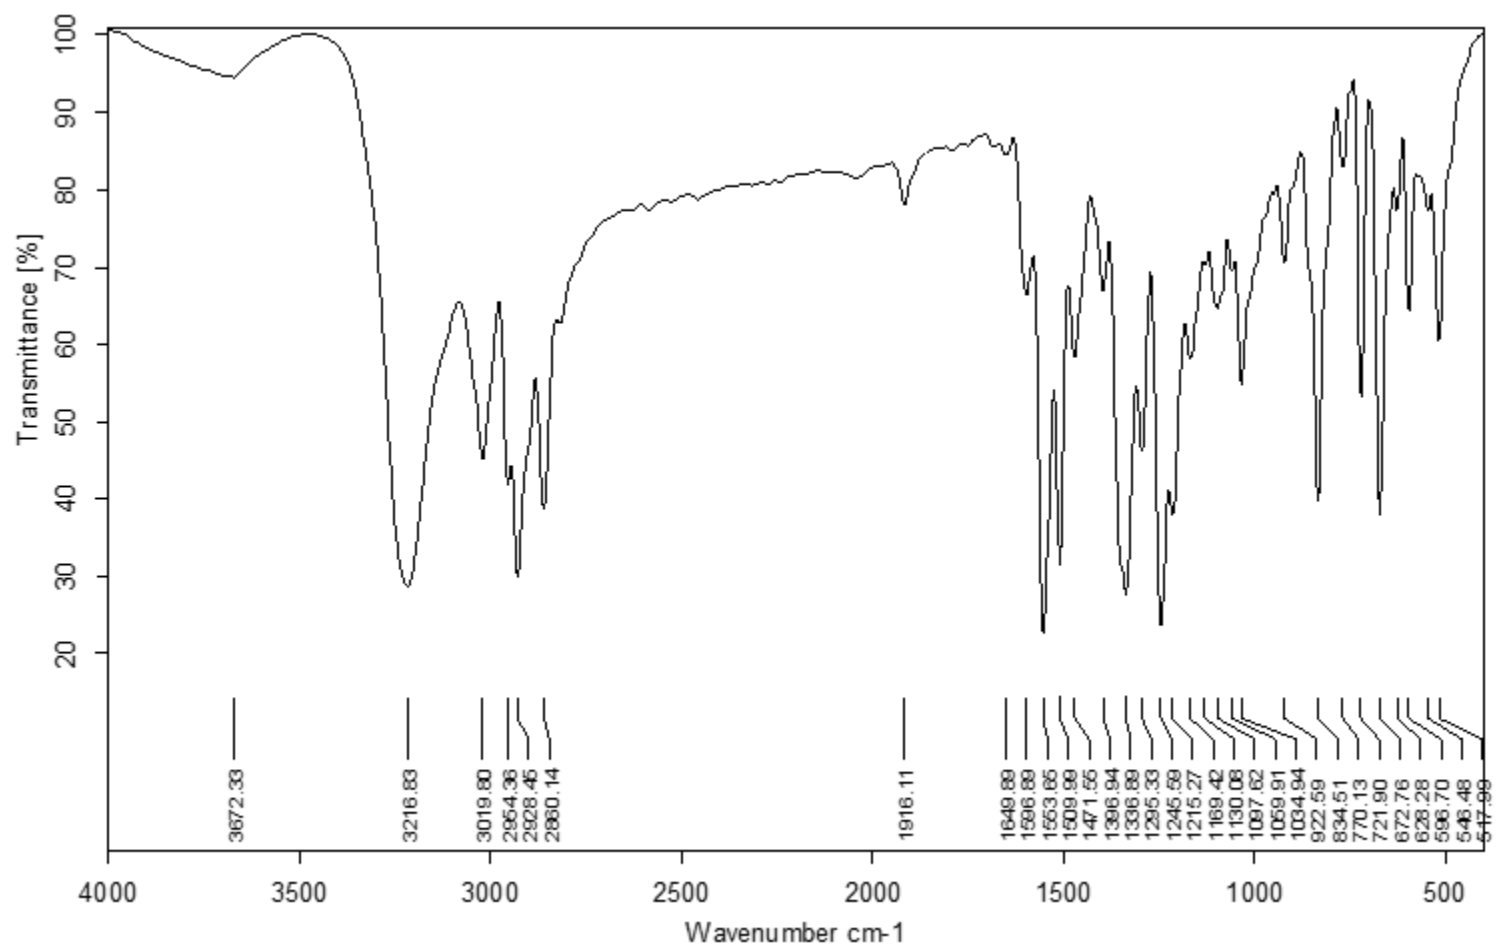

IR (KBr) spectrum of 1-(4-fluorophenyl)-3-(4-(hexyloxy)phenyl)thiourea **4**

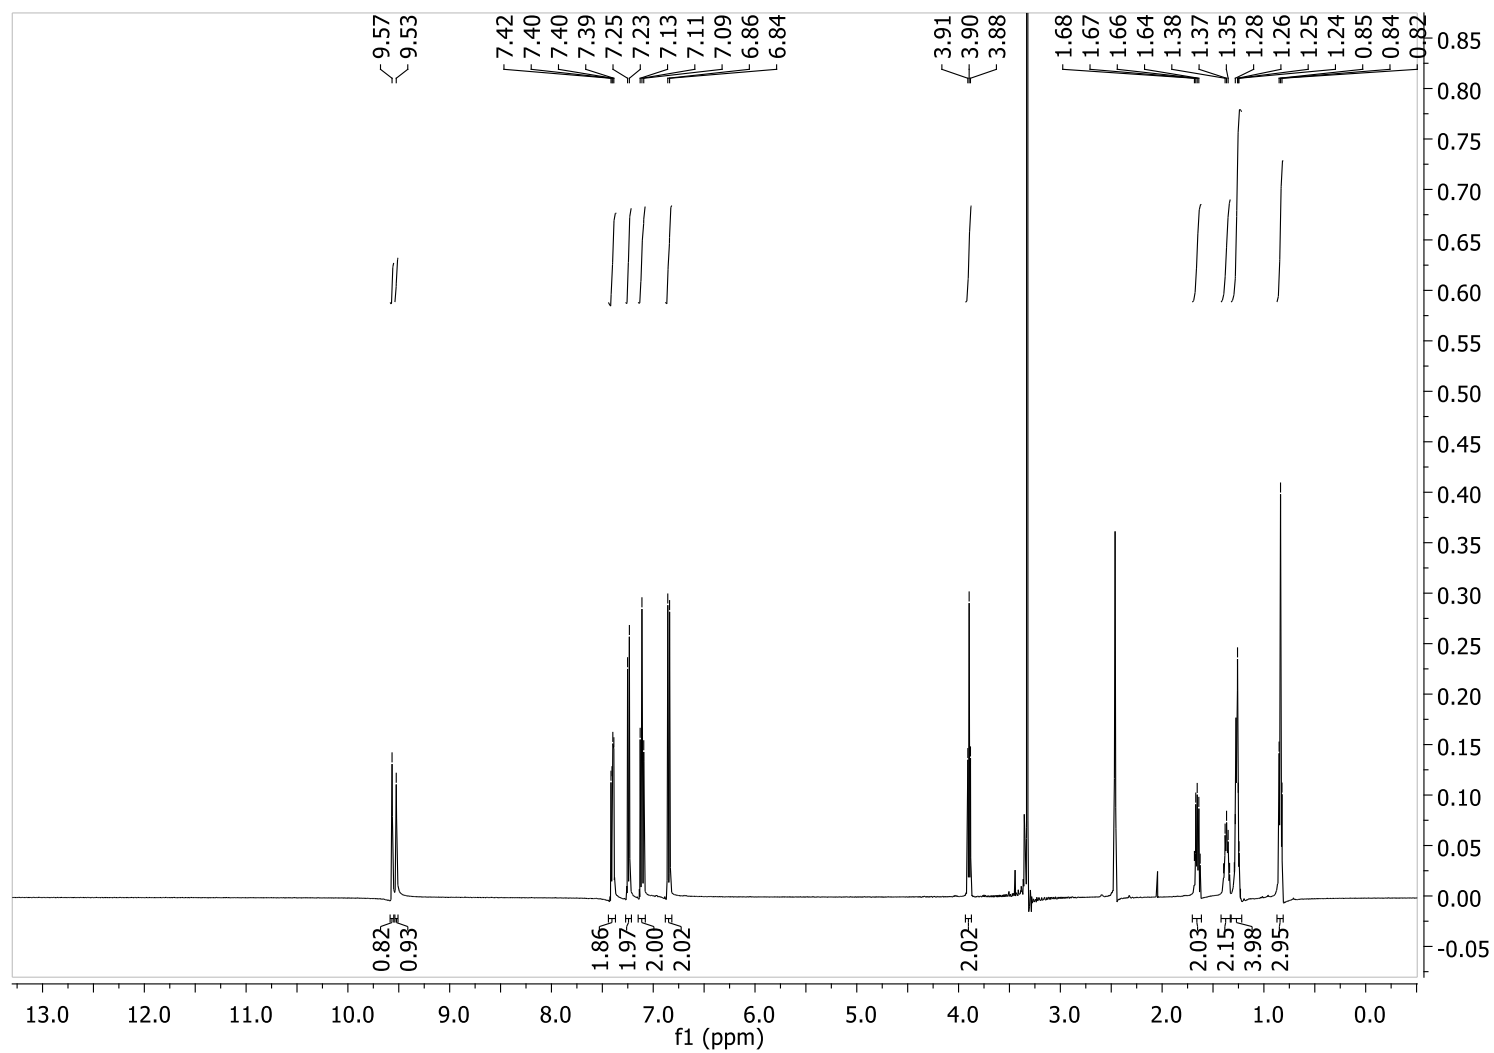

<sup>1</sup>H NMR (DMSO-*d*<sub>6</sub>) spectrum of 1-(4-fluorophenyl)-3-(4-(hexyloxy)phenyl)thiourea **4**

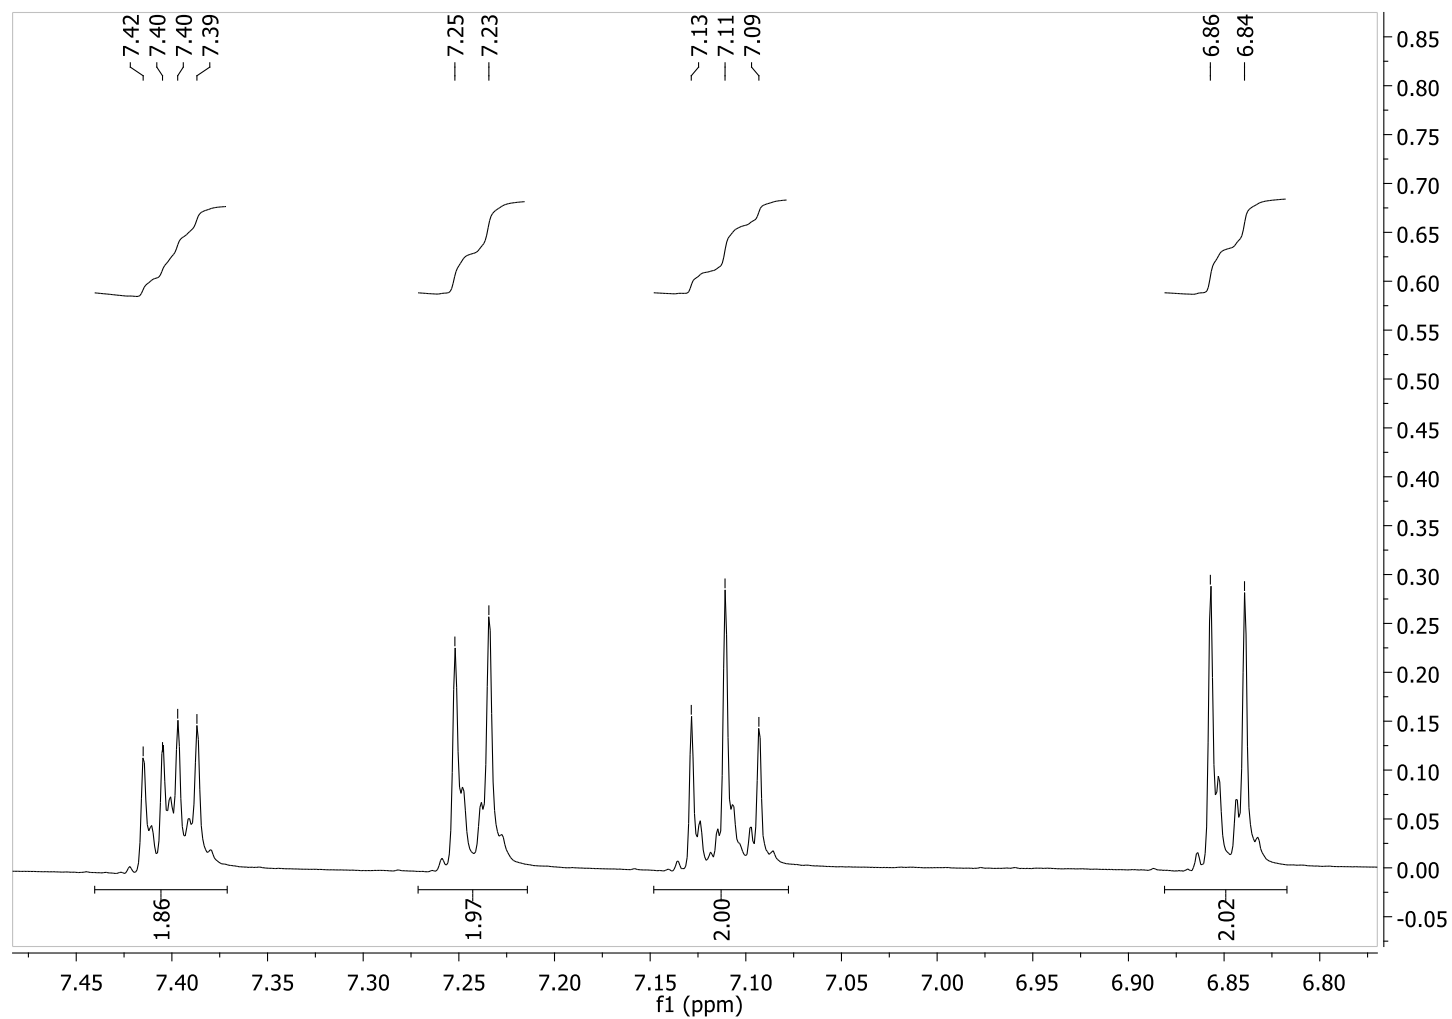

<sup>1</sup>H NMR (DMSO-*d*<sub>6</sub>) spectrum of 1-(4-fluorophenyl)-3-(4-(hexyloxy)phenyl)thiourea **4**

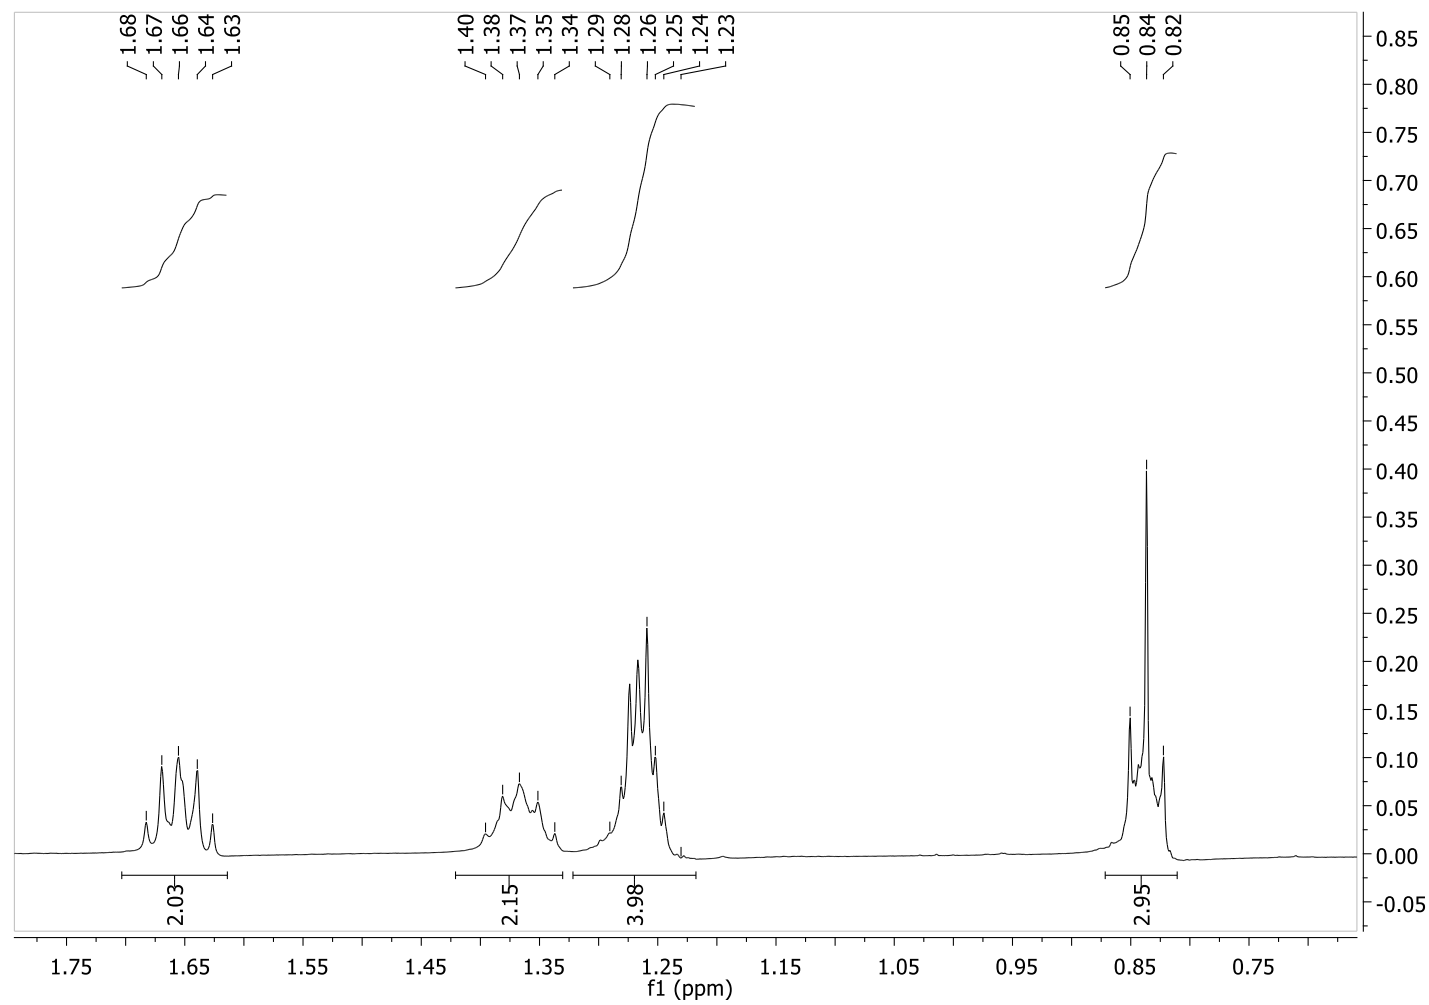

$^1\text{H}$  NMR ( $\text{DMSO-}d_6$ ) spectrum of 1-(4-fluorophenyl)-3-(4-(hexyloxy)phenyl)thiourea **4**

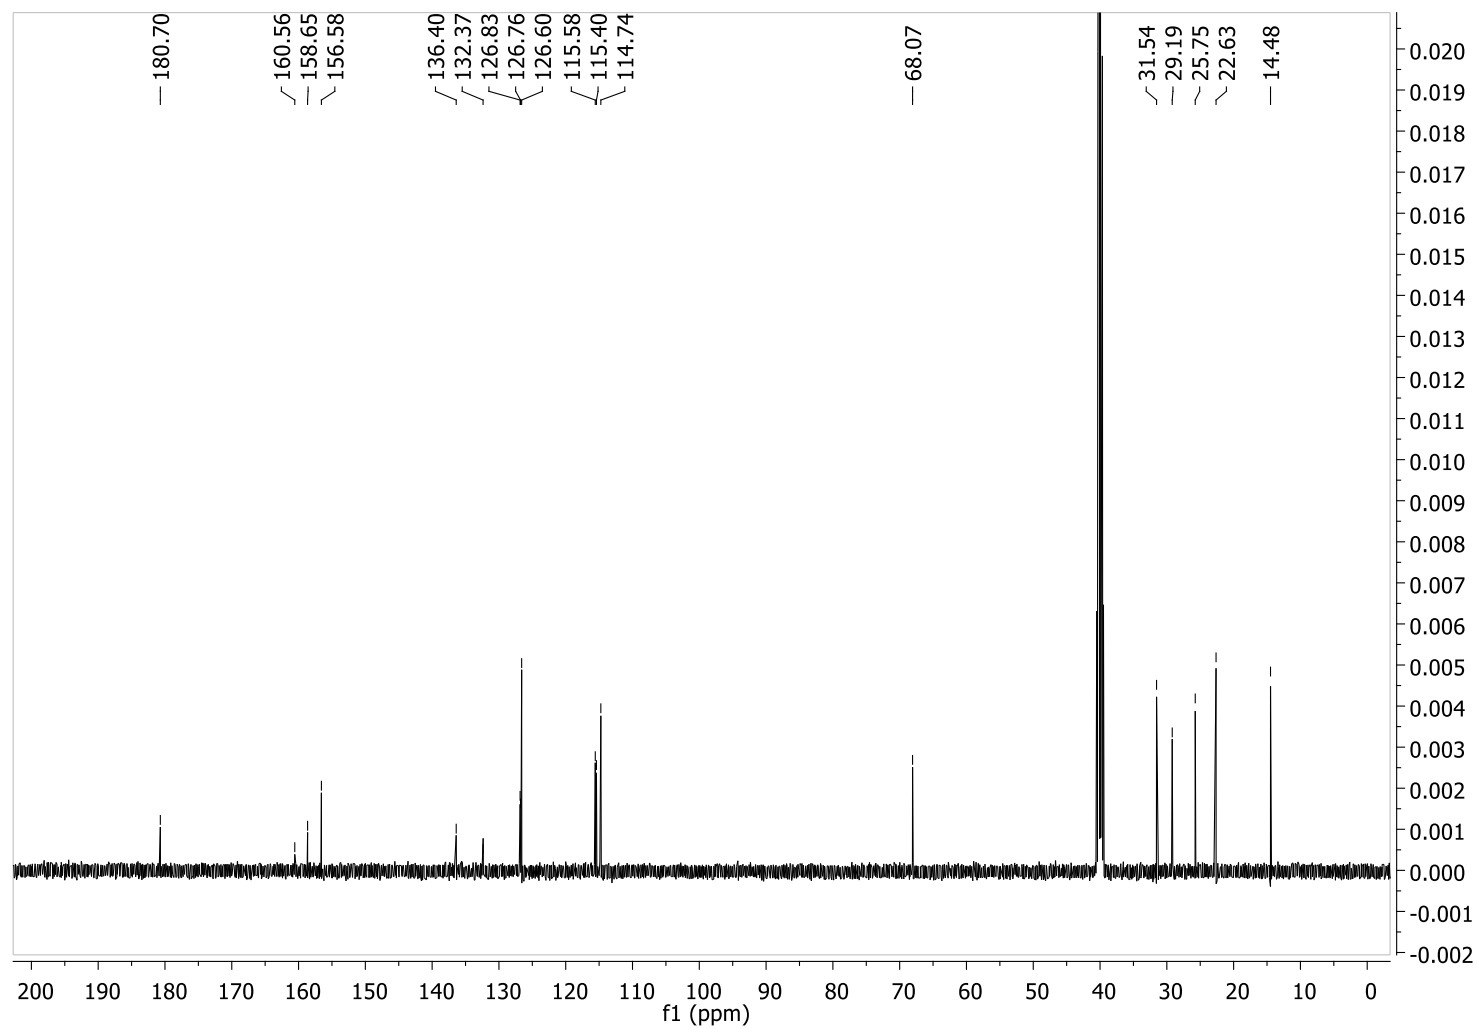

<sup>13</sup>C NMR (DMSO-*d*<sub>6</sub>) of 1-(4-fluorophenyl)-3-(4-(hexyloxy)phenyl)thiourea **4**



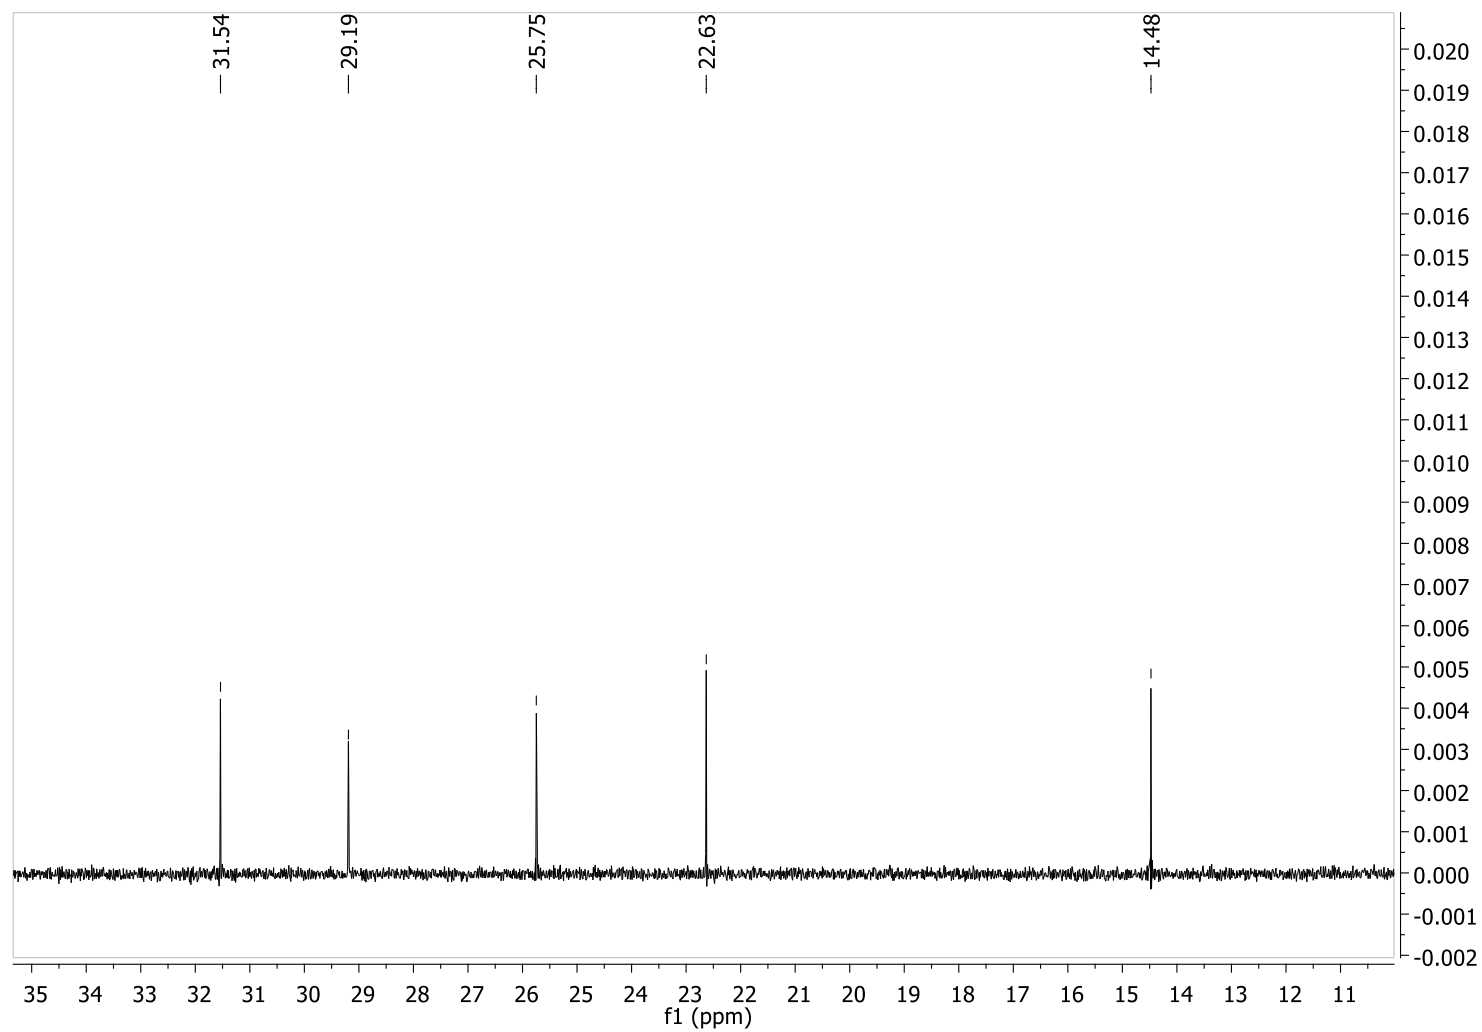

<sup>13</sup>C NMR (DMSO-*d*<sub>6</sub>) of 1-(4-fluorophenyl)-3-(4-(hexyloxy)phenyl)thiourea **4**

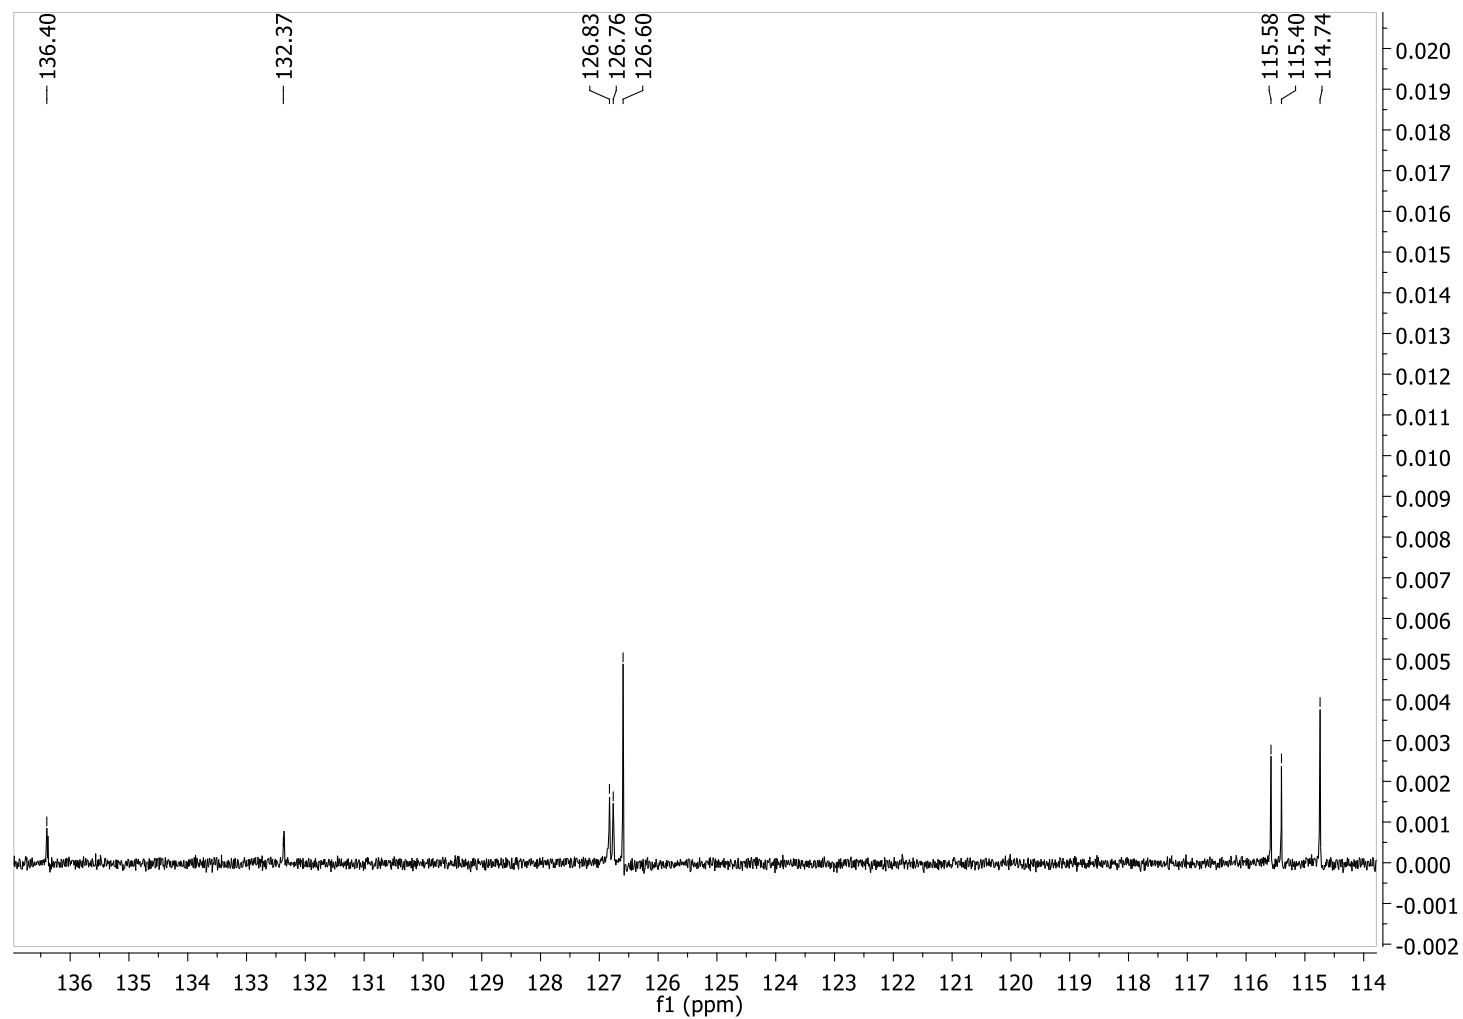

<sup>13</sup>C NMR (DMSO-*d*<sub>6</sub>) of 1-(4-fluorophenyl)-3-(4-(hexyloxy)phenyl)thiourea **4**

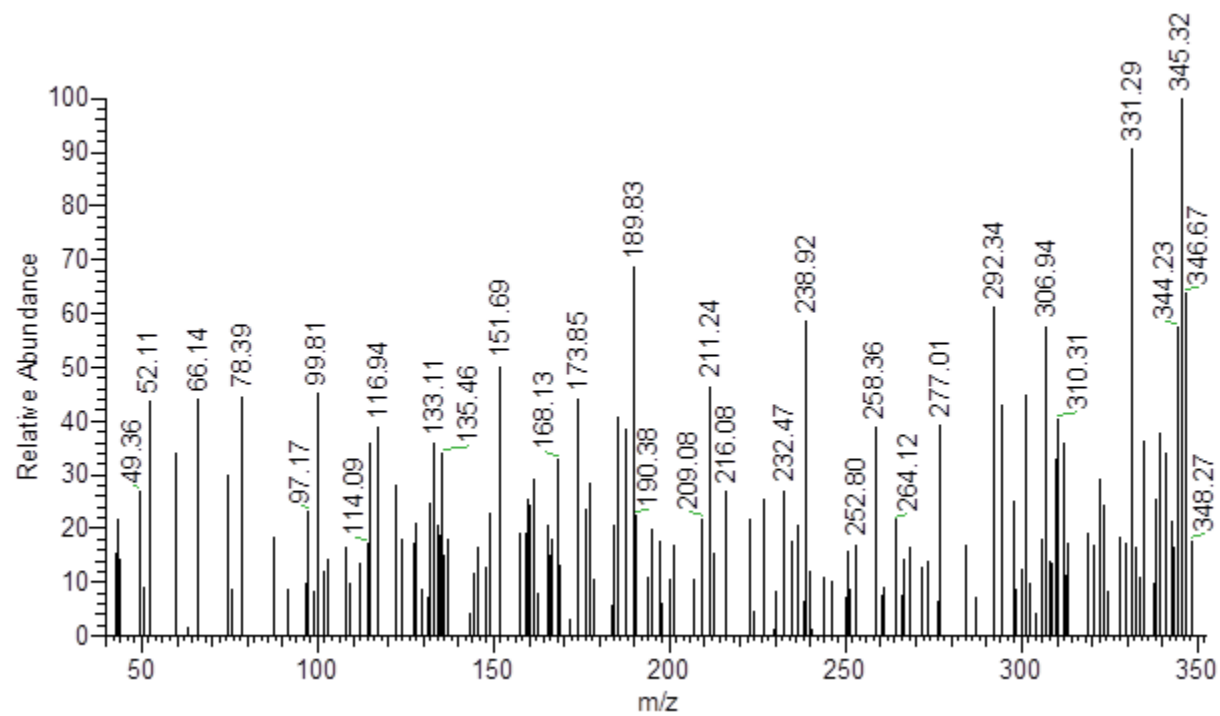

Mass spectrum of 1-(4-fluorophenyl)-3-(4-(hexyloxy)phenyl)thiourea **4**

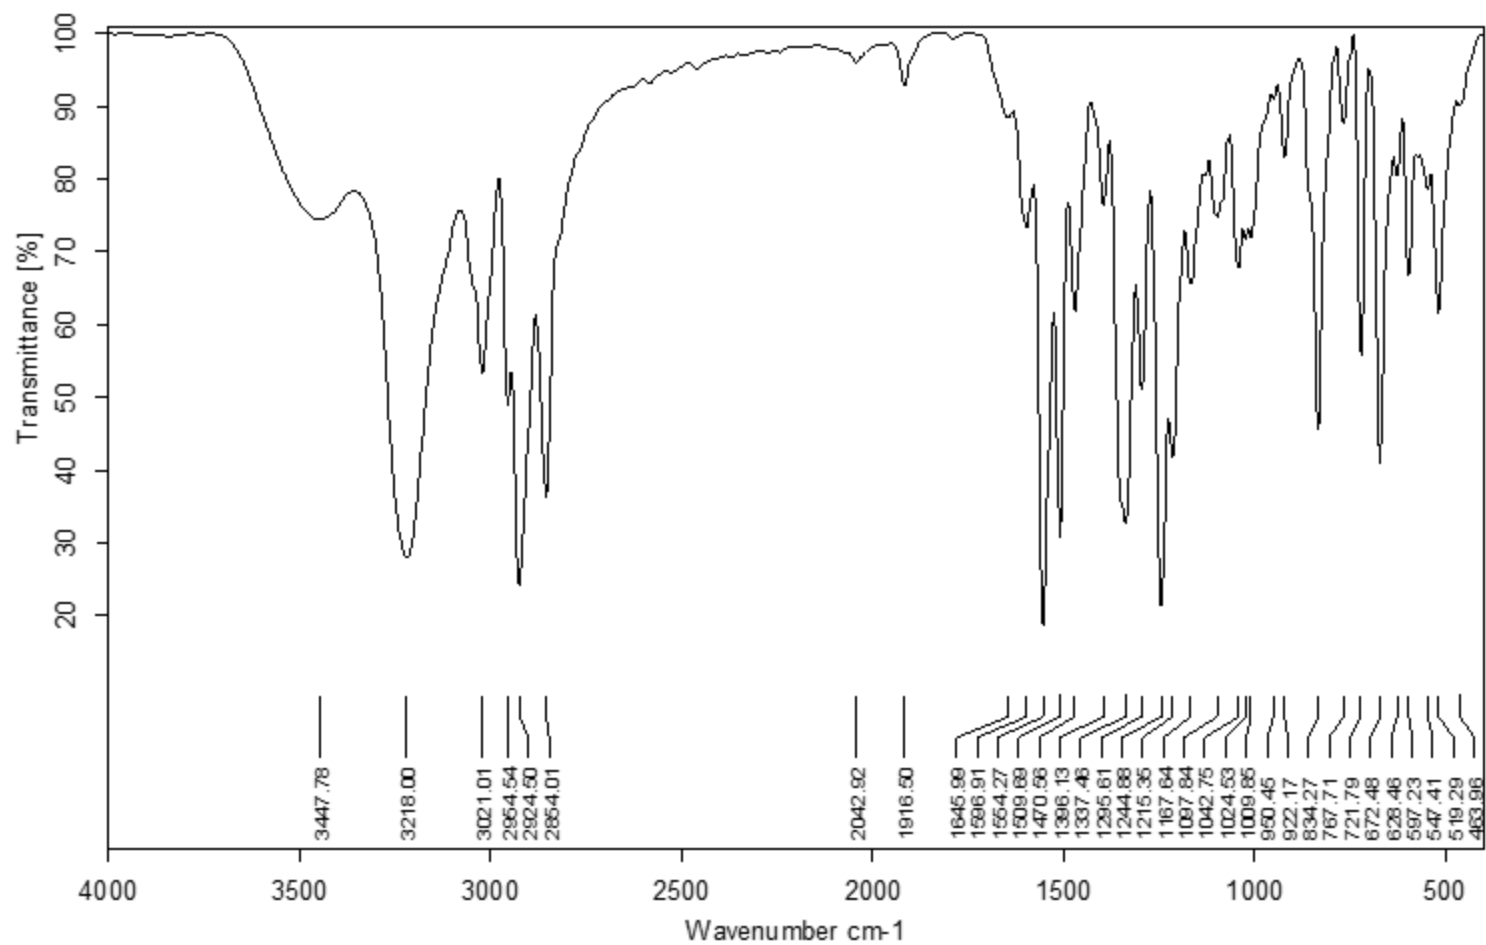

IR (KBr) spectrum of 1-(4-fluorophenyl)-3-(4-(octyloxy)phenyl)thiourea **5**

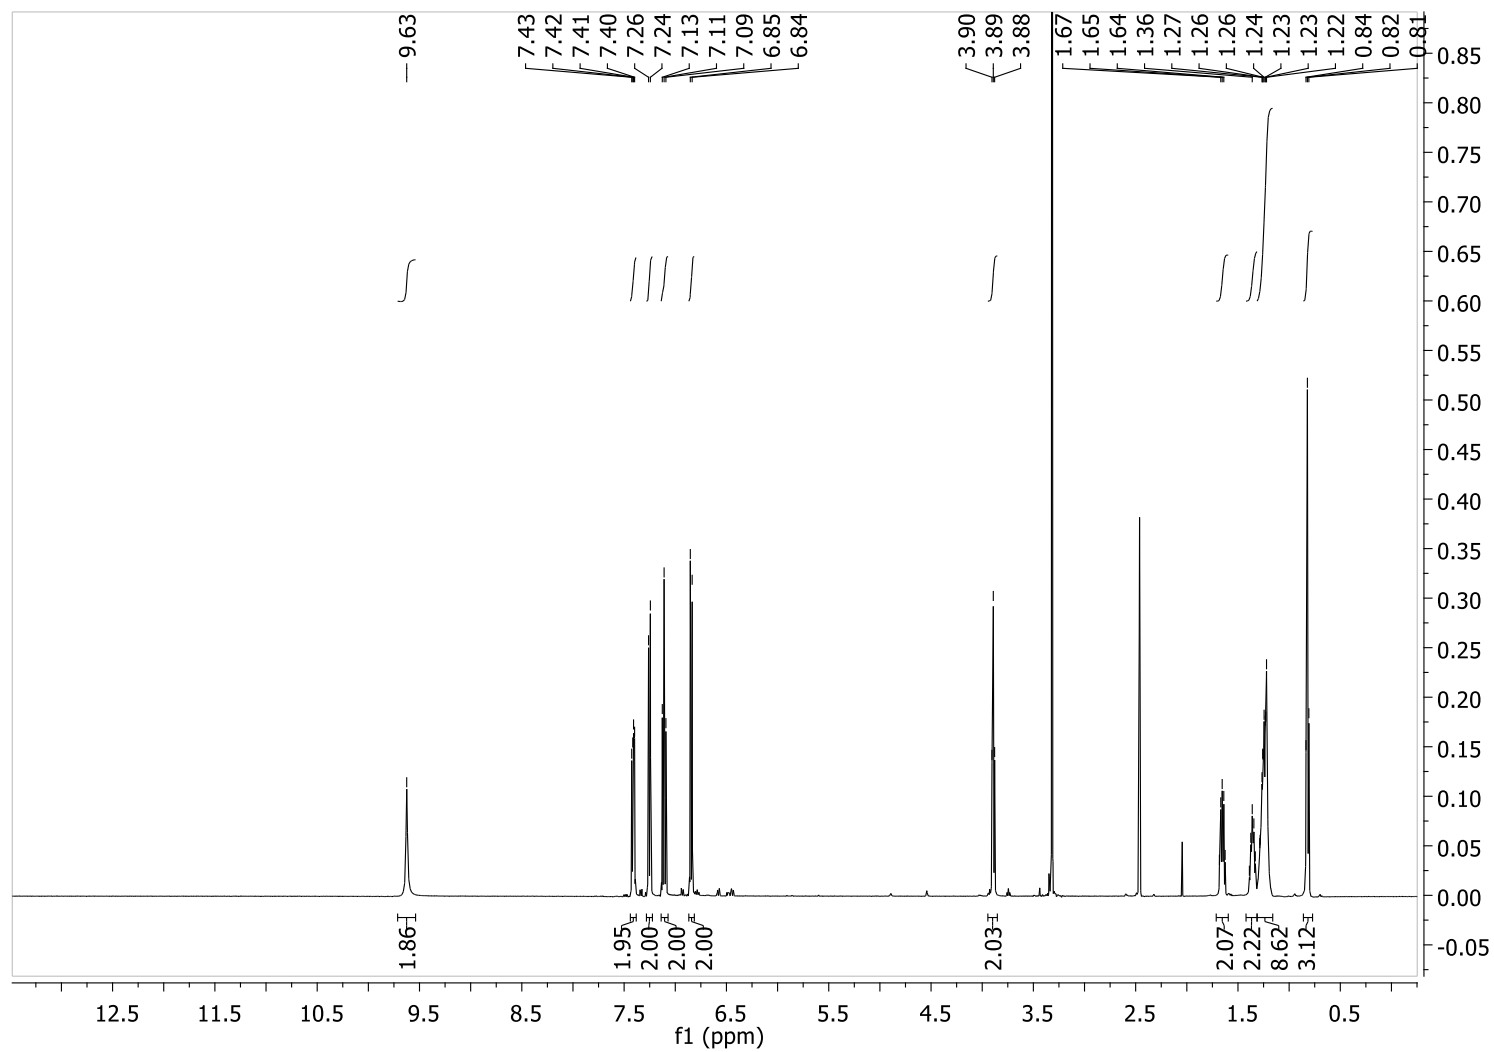

<sup>1</sup>H NMR (DMSO-*d*<sub>6</sub>) spectrum of 1-(4-fluorophenyl)-3-(4-(octyloxy)phenyl)thiourea **5**

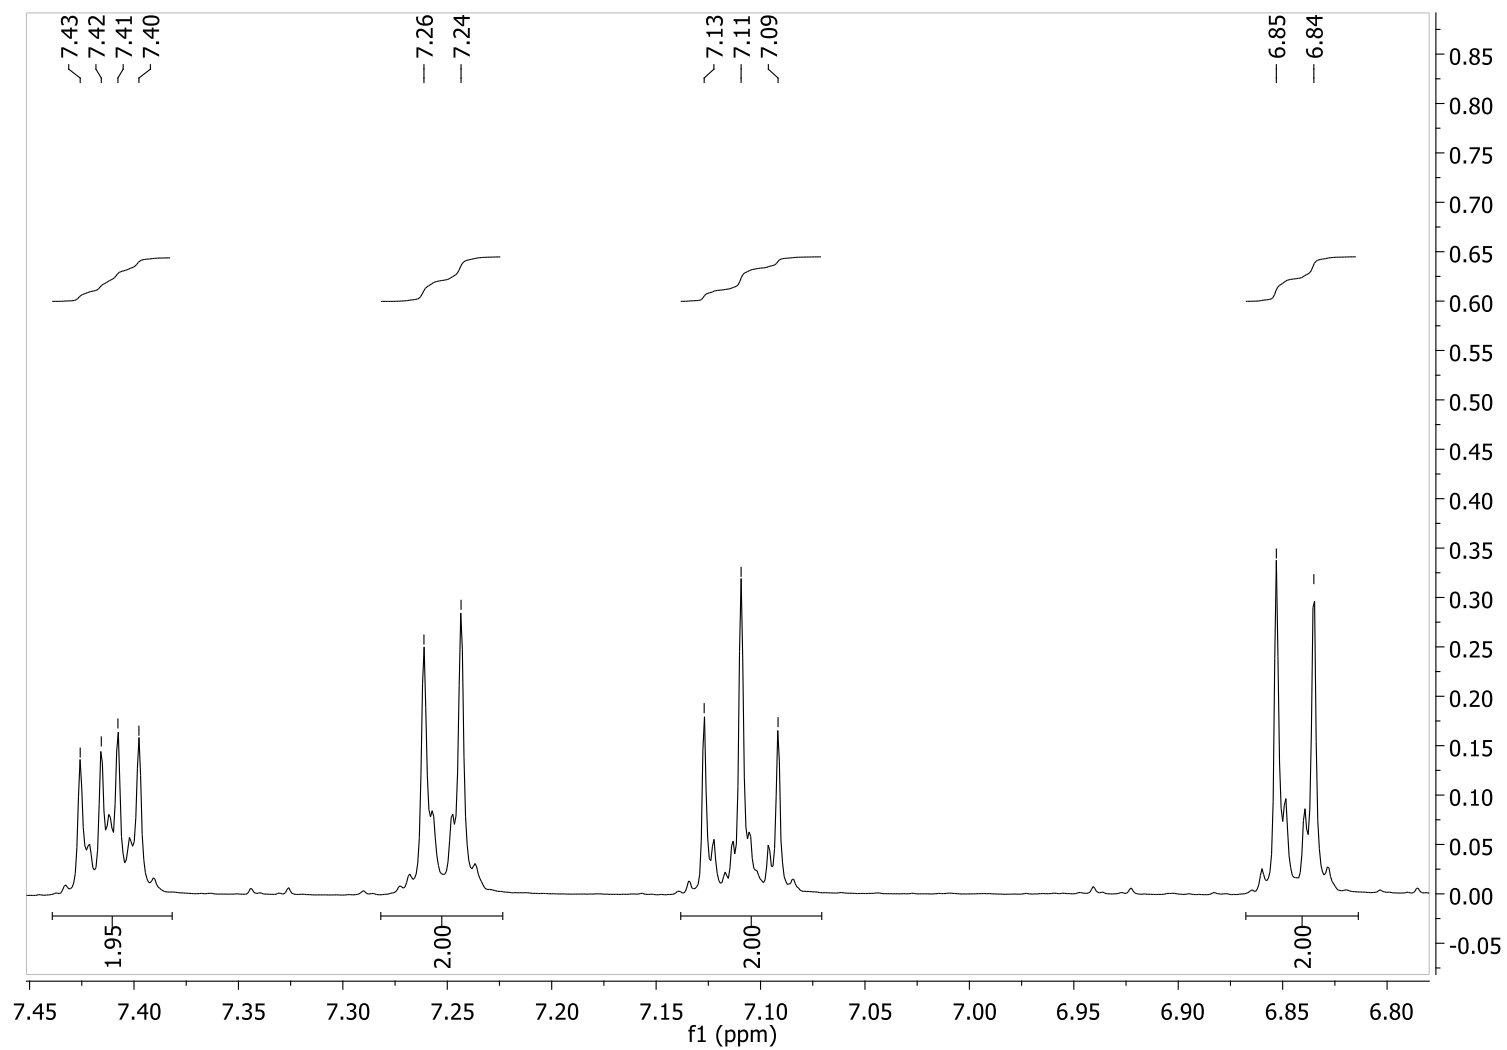

<sup>1</sup>H NMR (DMSO-*d*<sub>6</sub>) spectrum of 1-(4-fluorophenyl)-3-(4-(octyloxy)phenyl)thiourea **5**

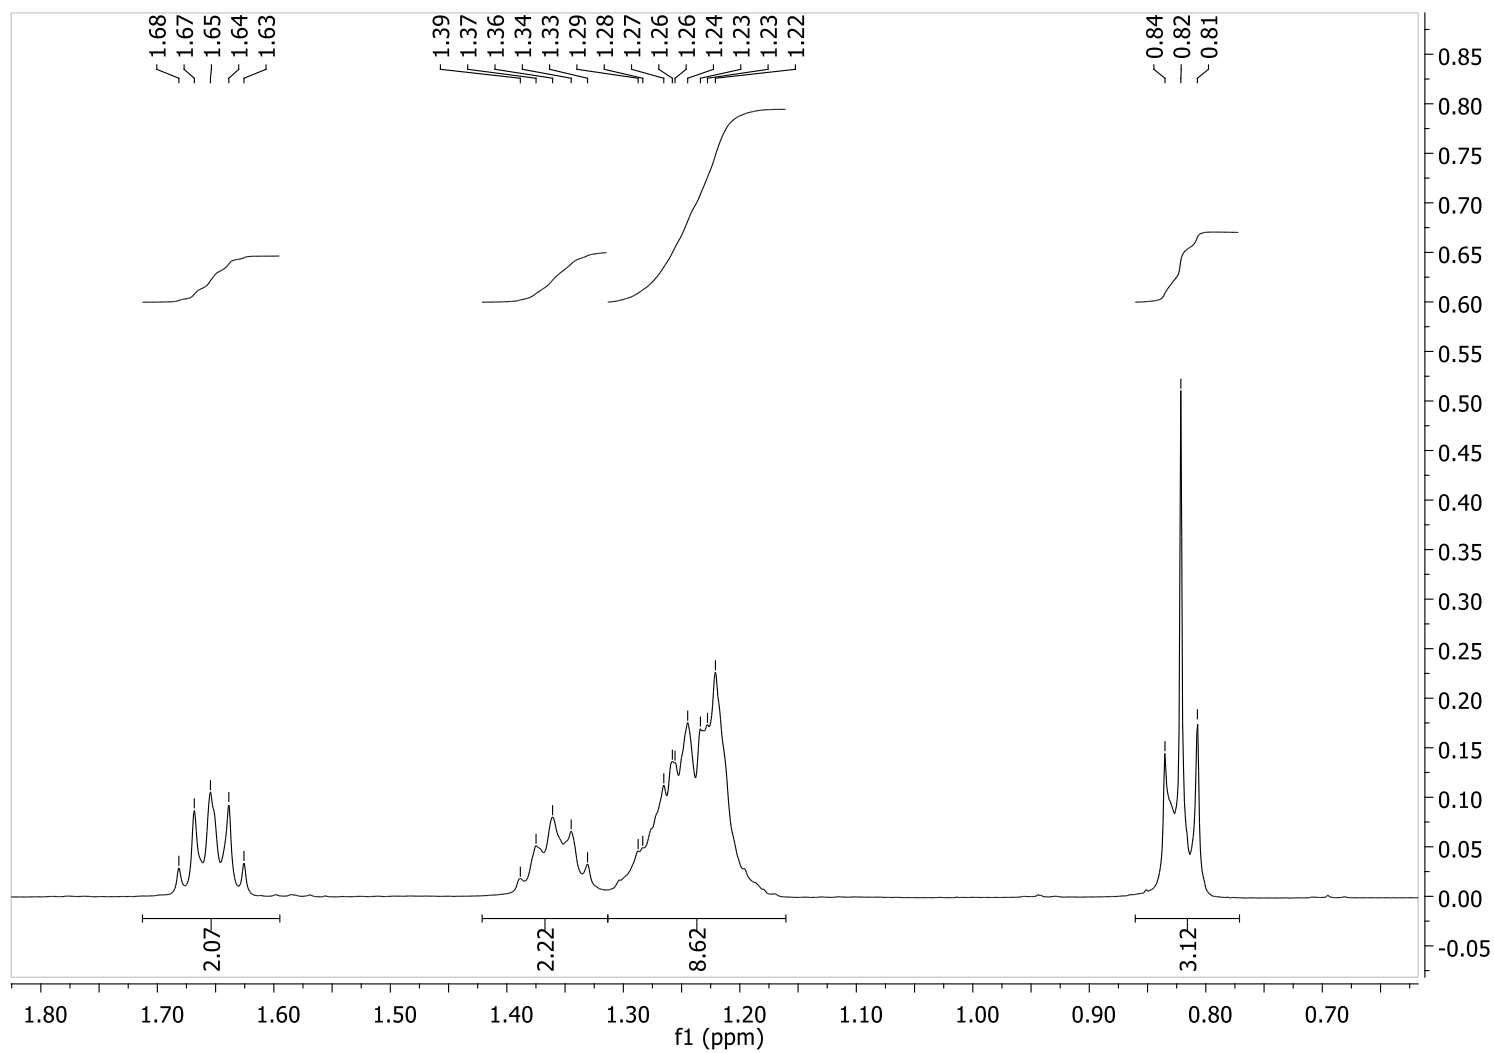

<sup>1</sup>H NMR (DMSO-*d*<sub>6</sub>) spectrum of 1-(4-fluorophenyl)-3-(4-(octyloxy)phenyl)thiourea **5**

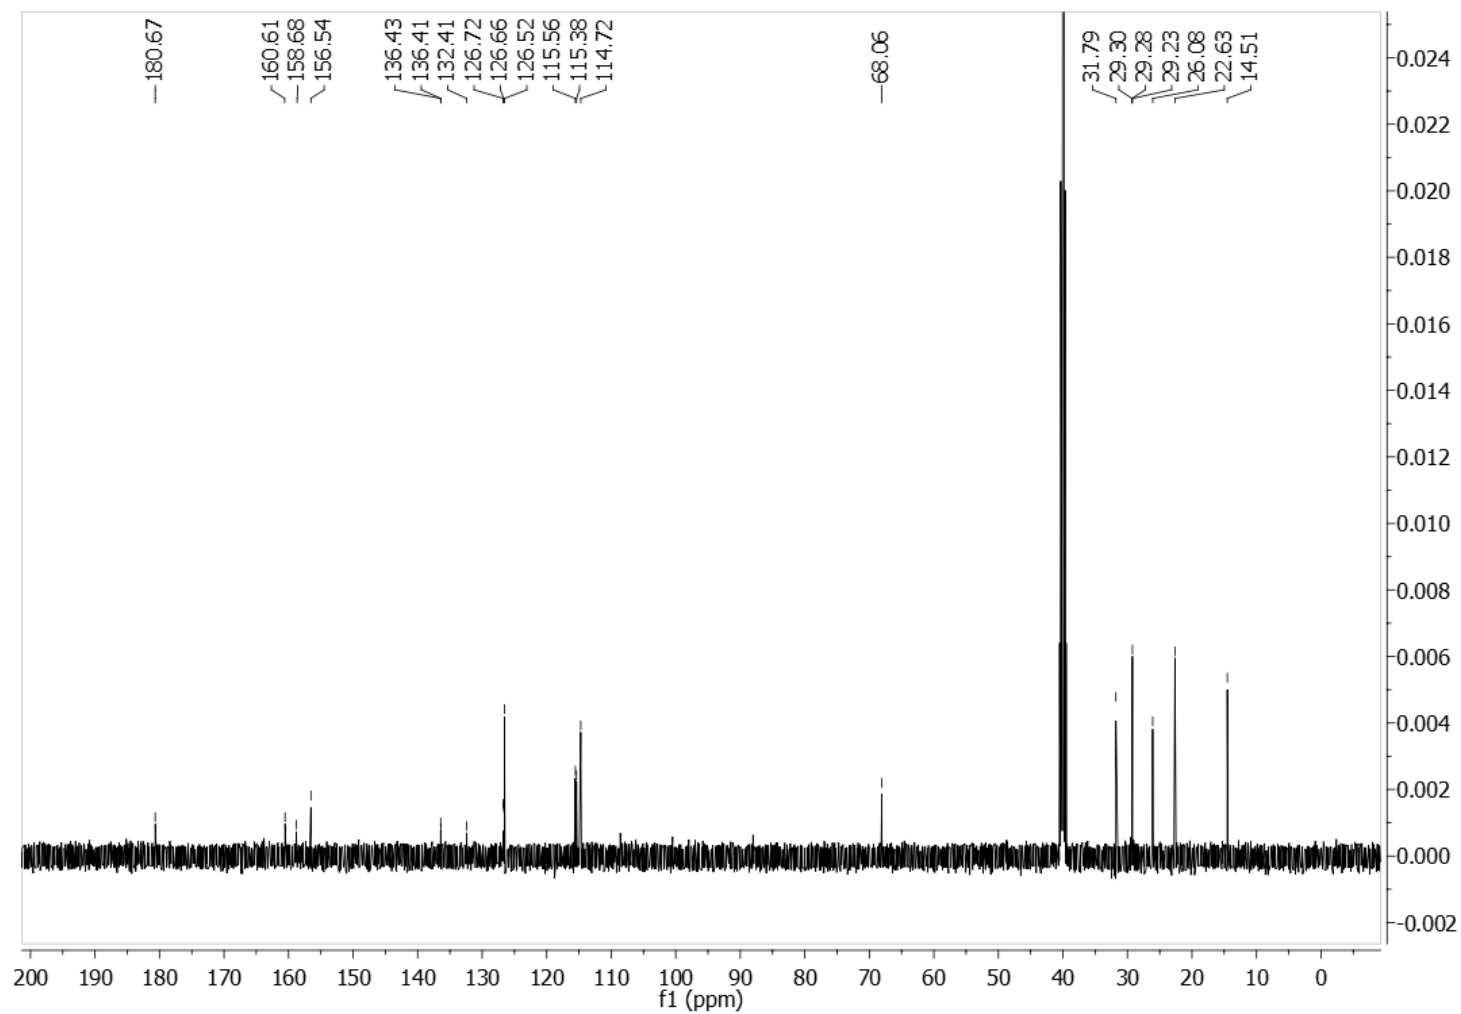

<sup>13</sup>C NMR (DMSO-*d*<sub>6</sub>) of 1-(4-fluorophenyl)-3-(4-(octyloxy)phenyl)thiourea **5**



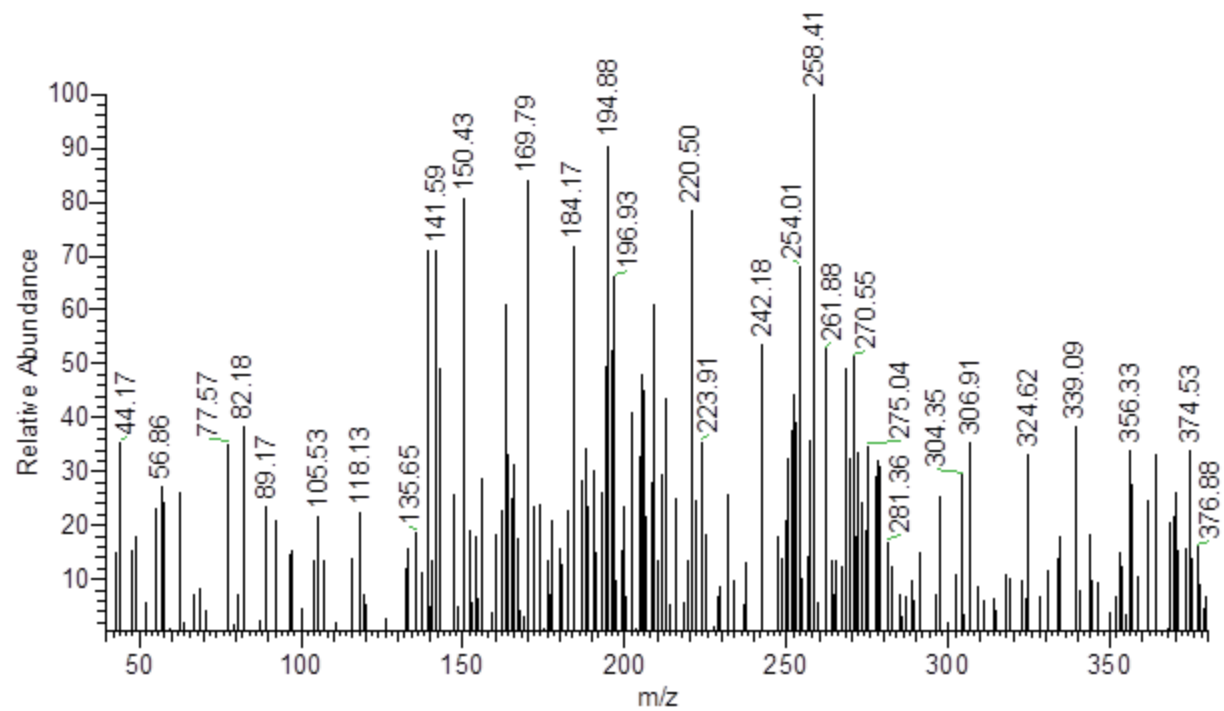

Mass spectrum of 1-(4-fluorophenyl)-3-(4-(octyloxy)phenyl)thiourea **5**

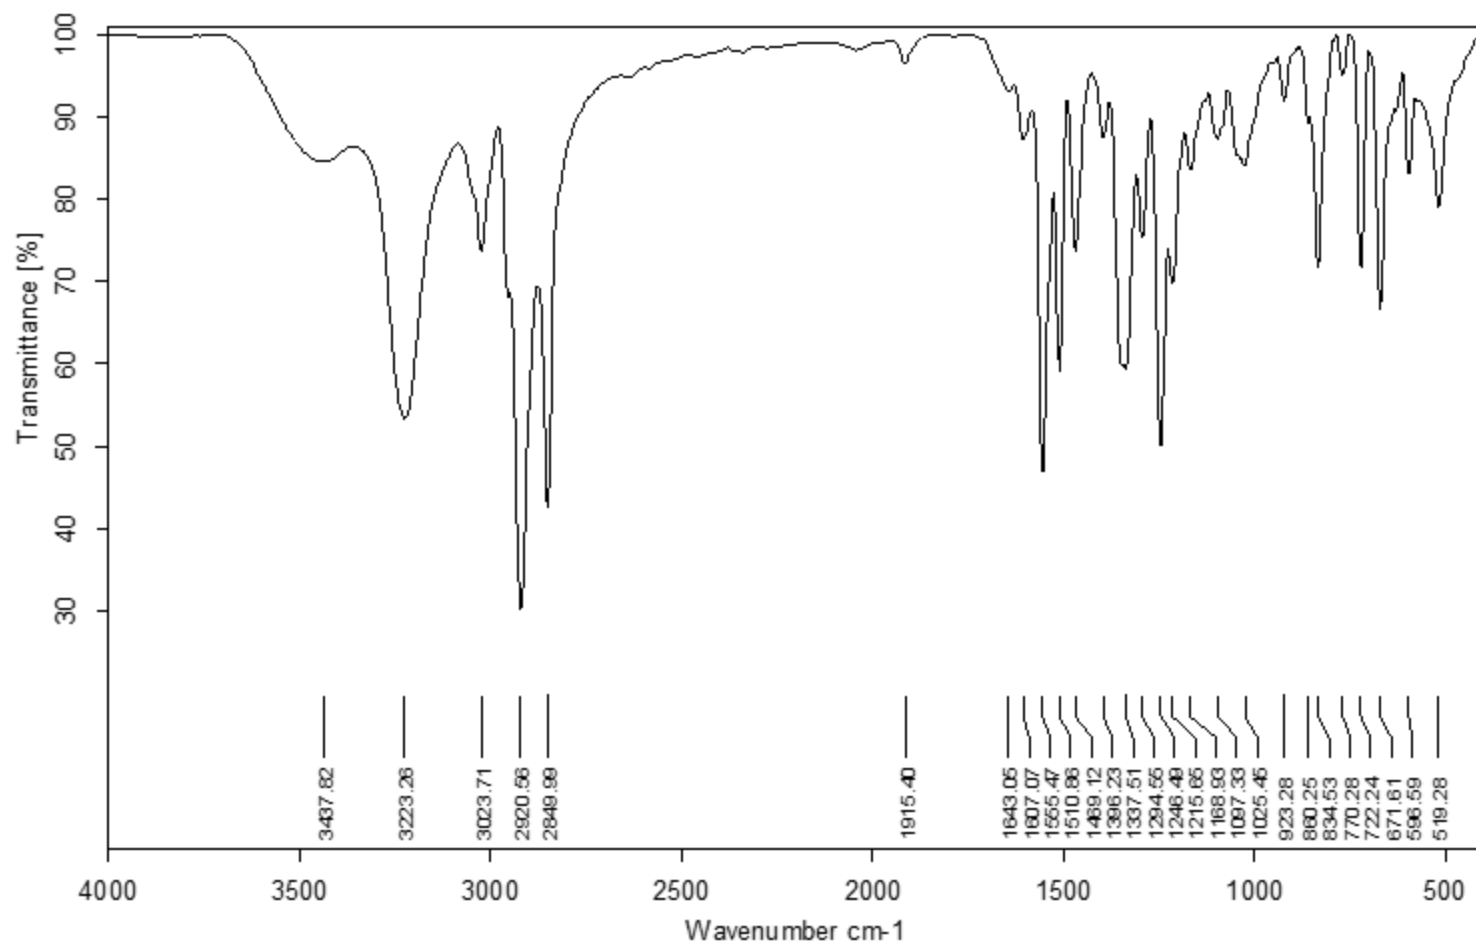

IR (KBr) spectrum of 1-(4-fluorophenyl)-3-(4-(hexadecyloxy)phenyl)thiourea **6**

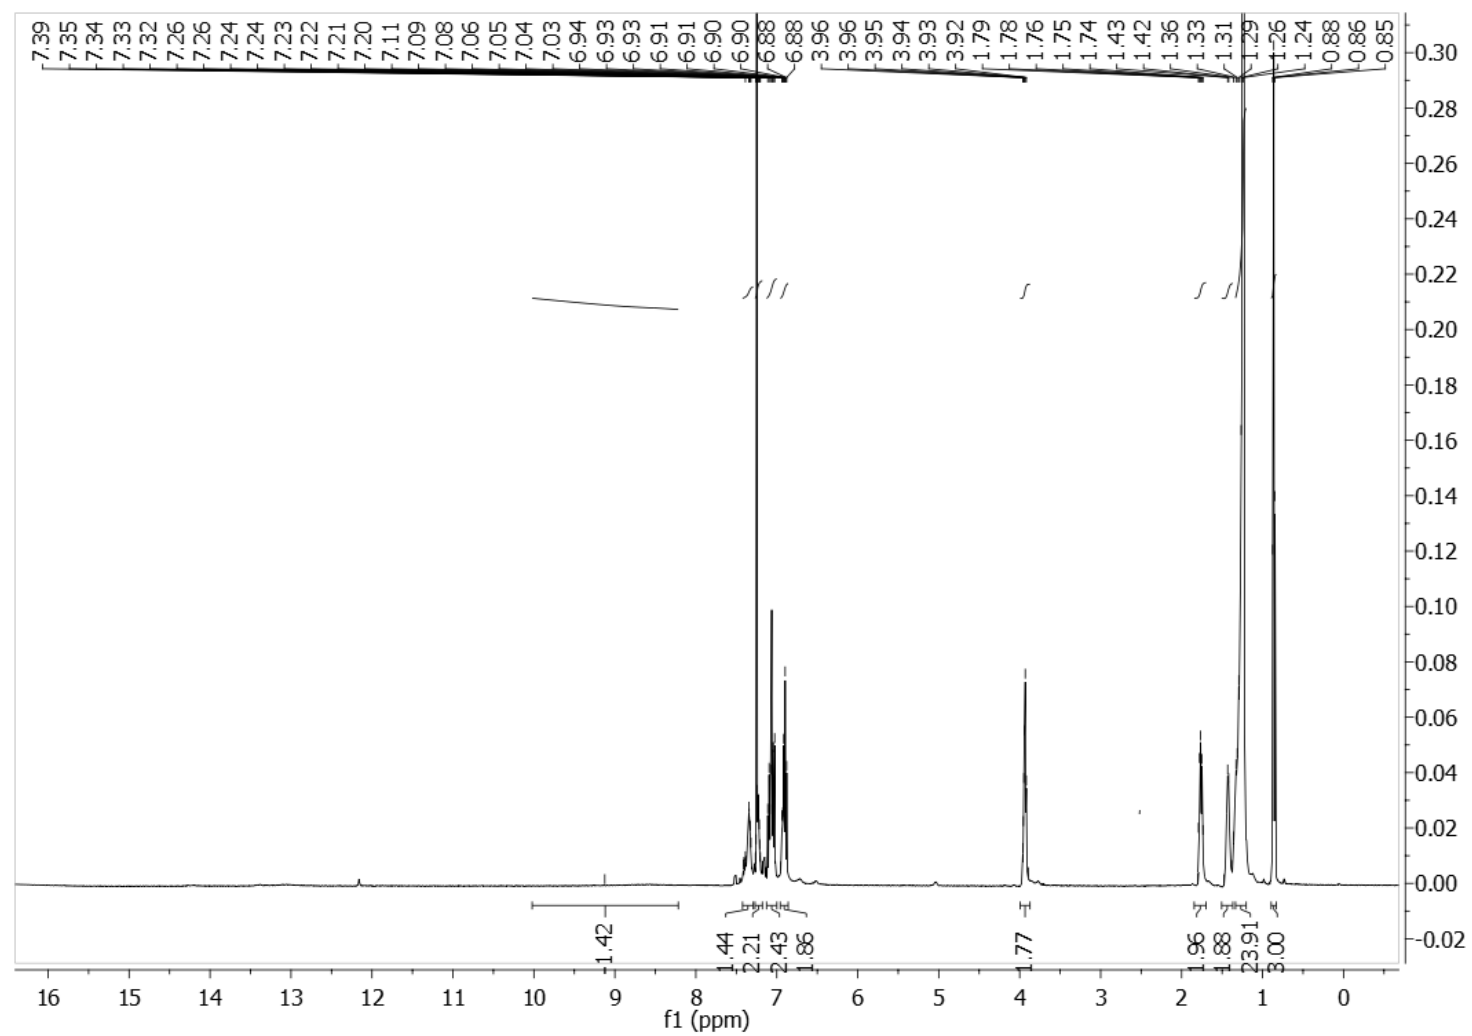

<sup>1</sup>H NMR (CDCl<sub>3</sub>) spectrum of 1-(4-fluorophenyl)-3-(4-(hexadecyloxy)phenyl)thiourea **6**

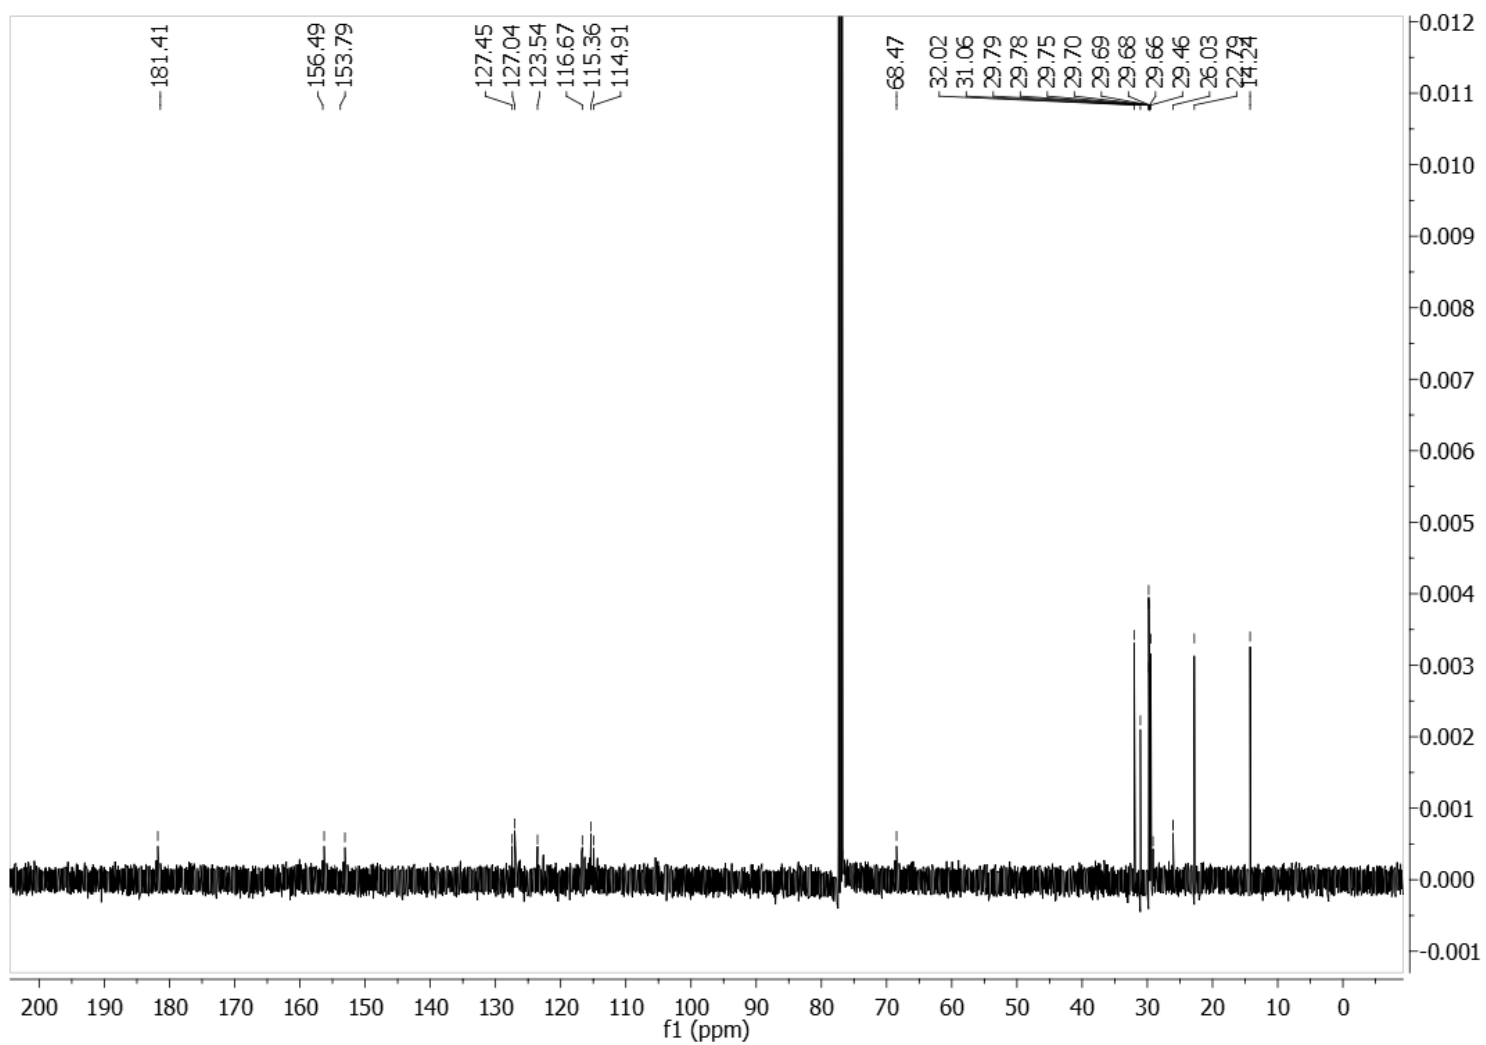

<sup>13</sup>C NMR (CDCl<sub>3</sub>) of 1-(4-fluorophenyl)-3-(4-(hexadecyloxy)phenyl)thiourea **6**

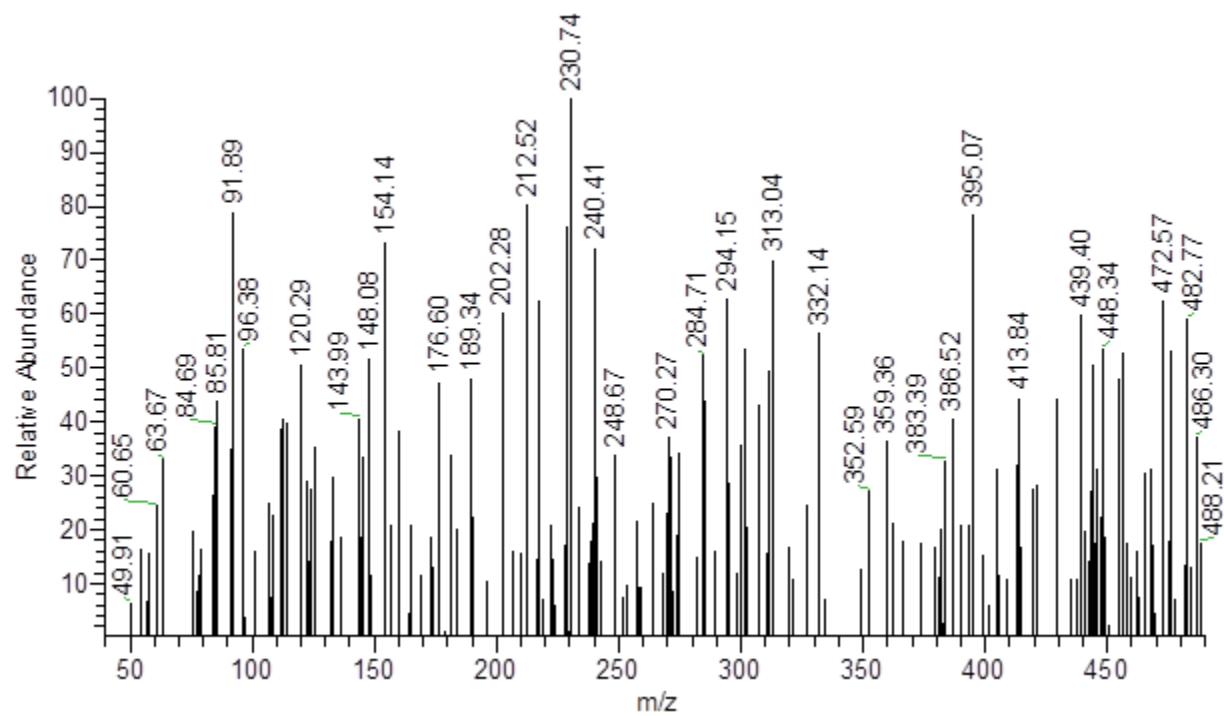

Mass spectrum of 1-(4-fluorophenyl)-3-(4-(hexadecyloxy)phenyl)thiourea **6**
